# Supplementary material for: Visible-light-mediated tandem phosphorylation/cyclization for the synthesis of phosphorylated oxindoles
Source: Royal Society of Chemistry journal article supplement (doi:10.1039/d1ob02486h), 2022-01-01

## Visible-light-mediated tandem phosphorylation/cyclization for the synthesis of phosphorylated oxindoles

Liu-Liang Mao,<sup>a\*</sup> An-Xi Zhou,<sup>a</sup> Xian-Hong Zhu,<sup>a</sup> Li-Xia Quan,<sup>a\*</sup> Fayun Chen,<sup>a</sup> Jie-Ping Wan,<sup>b</sup> Yin-Long Lai<sup>c</sup>

<sup>a</sup> Key Laboratory of Applied Organic Chemistry, Higher Institutions of Jiangxi Province, Shangrao Normal University, Shangrao 334001, P. R. China.

<sup>b</sup> College of Chemistry and Chemical Engineering, Jiangxi Normal University, Nanchang 330022, P. R. China.

<sup>c</sup> College of Chemistry and Environmental Engineering, Shaoguan University, Shaoguan, P. R. China

### Contents:

|                                            |   |
|--------------------------------------------|---|
| 1. General information.....                | 1 |
| 2. Optimization of Reaction Condition..... | 1 |
| 3. The General Procedures.....             | 2 |
| 4. Preliminary mechanistic studies.....    | 3 |
| 5. References.....                         | 3 |
| 6. Characterization data of products.....  | 4 |
| 7. Copies of NMR spectra.....              | 9 |

## I . General Methods and Materials

All reactions involving air- and moisture-sensitive reagents were carried out under an argon atmosphere.  $^1\text{H}$  and  $^{13}\text{C}$  NMR spectra were recorded on a Bruker advance III 400 spectrometer (400 MHz for  $^1\text{H}$  and 101 MHz for  $^{13}\text{C}$ ) in  $\text{CDCl}_3$  with TMS as internal standard. Chemical shifts ( $\delta$ ) were measured in ppm relative to TMS  $\delta = 0$  for  $^1\text{H}$ , or to chloroform  $\delta = 77.0$  for  $^{13}\text{C}$  as internal standard ( $\text{DMSO}-d_6$   $\delta = 2.5$  for  $^1\text{H}$  NMR, or  $\delta = 40.0$  for  $^{13}\text{C}$  NMR).  $^{31}\text{P}$  and  $^{19}\text{F}$  NMR spectra were recorded on the same instrument. Data are reported as follows: Chemical shift, multiplicity (s = singlet, d = doublet, t = triplet, q = quartet, m = multiplet), Coupling constants,  $J$ , are reported in hertz. Mass data were measured with Thermo Scientific DSQ II mass spectrometer. High resolution mass spectra (HRMS) were obtained on an Agilent LC-MSD-Trap-XCT spectrometer with micromass MS software using electrospray ionisation (ESI). The starting materials were purchased from Aldrich, Acros Organics, J&K Chemicals or TCI and used without further purification. Solvents were dried and purified according to the procedure from "Purification of Laboratory Chemicals book". Thin-layer chromatography (TLC) was performed using 60 mesh silica gel plates visualized with short-wavelength UV light (254 nm). Column chromatography was carried out on silica gel (particle size 200-400 mesh ASTM) Substrates were prepared according to published literature methods.<sup>[S1]</sup>

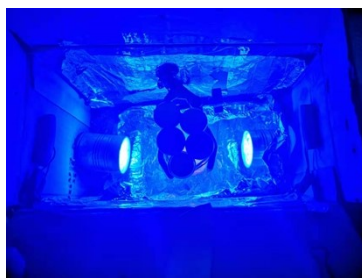

Figure S1. Devices for the photocatalytic reactions

## 2. Optimization of Reaction Condition

Table S1. Optimization of the Solvent<sup>[a]</sup>

| <chem>CC(=O)N(c1ccccc1)C=C</chem> ( <b>1a</b> ) + <chem>OP(=O)(c1ccccc1)c2ccccc2</chem> ( <b>2a</b> ) $\xrightarrow[\text{rt, Ar, Blue LEDs}]{\text{Ru(bpy)}_3\text{Cl}_2 \cdot 6\text{H}_2\text{O}, \text{TBPB}, \text{Na}_2\text{CO}_3, \text{Solvent}}$ <chem>CC(=O)N1C=Cc2ccccc2C1COP(=O)(c3ccccc3)c4ccccc4</chem> ( <b>3aa</b> ) |                                                         |         |                          |                          |                          |
|---------------------------------------------------------------------------------------------------------------------------------------------------------------------------------------------------------------------------------------------------------------------------------------------------------------------------------------|---------------------------------------------------------|---------|--------------------------|--------------------------|--------------------------|
| Entry                                                                                                                                                                                                                                                                                                                                 | Photocatalyst                                           | Oxidant | Base                     | Solvent                  | Yield (%) <sup>[b]</sup> |
| 1                                                                                                                                                                                                                                                                                                                                     | $\text{Ru(bpy)}_3\text{Cl}_2 \cdot 6\text{H}_2\text{O}$ | TBPB    | $\text{Na}_2\text{CO}_3$ | MeCN                     | 84 (82) <sup>[c]</sup>   |
| 2                                                                                                                                                                                                                                                                                                                                     | $\text{Ru(bpy)}_3\text{Cl}_2 \cdot 6\text{H}_2\text{O}$ | TBPB    | $\text{Na}_2\text{CO}_3$ | DMF                      | 76                       |
| 3                                                                                                                                                                                                                                                                                                                                     | $\text{Ru(bpy)}_3\text{Cl}_2 \cdot 6\text{H}_2\text{O}$ | TBPB    | $\text{Na}_2\text{CO}_3$ | DCM                      | 13                       |
| 4                                                                                                                                                                                                                                                                                                                                     | $\text{Ru(bpy)}_3\text{Cl}_2 \cdot 6\text{H}_2\text{O}$ | TBPB    | $\text{Na}_2\text{CO}_3$ | Toluene                  | 23                       |
| 5                                                                                                                                                                                                                                                                                                                                     | $\text{Ru(bpy)}_3\text{Cl}_2 \cdot 6\text{H}_2\text{O}$ | TBPB    | $\text{Na}_2\text{CO}_3$ | Dioxane                  | trace                    |
| 6                                                                                                                                                                                                                                                                                                                                     | $\text{Ru(bpy)}_3\text{Cl}_2 \cdot 6\text{H}_2\text{O}$ | TBPB    | $\text{Na}_2\text{CO}_3$ | $\text{CH}_3\text{NO}_2$ | trace                    |

<sup>[a]</sup> The reaction was performed with **1a** (0.2 mmol), **2a** (1.3 equiv.), TBPB (2.0 equiv.),  $\text{Na}_2\text{CO}_3$  (1.3 equiv.),  $\text{Ru(bpy)}_3\text{Cl}_2 \cdot 6\text{H}_2\text{O}$  (2 mol%) in solvent (2.0 mL) was irradiated by 5 W blue LEDs under Ar at rt for 24 h. <sup>[b]</sup> The yields were determined based on crude  $^1\text{H}$  NMR spectroscopy using 1,3,5-trimethoxybenzene as the internal standard. <sup>[c]</sup> Isolated yields.

Table S2. Optimization of the Oxidant<sup>[a]</sup>

| entry | photocatalyst                                           | oxidant                                      | base                            | solvent | yield (%) <sup>[b]</sup> |
|-------|---------------------------------------------------------|----------------------------------------------|---------------------------------|---------|--------------------------|
| 1     | Ru(bpy) <sub>3</sub> Cl <sub>2</sub> ·6H <sub>2</sub> O | BPO                                          | Na <sub>2</sub> CO <sub>3</sub> | MeCN    | 15                       |
| 2     | Ru(bpy) <sub>3</sub> Cl <sub>2</sub> ·6H <sub>2</sub> O | K <sub>2</sub> S <sub>2</sub> O <sub>8</sub> | Na <sub>2</sub> CO <sub>3</sub> | MeCN    | 37                       |
| 3     | Ru(bpy) <sub>3</sub> Cl <sub>2</sub> ·6H <sub>2</sub> O | TBHP <sup>[c]</sup>                          | Na <sub>2</sub> CO <sub>3</sub> | MeCN    | 31                       |
| 4     | Ru(bpy) <sub>3</sub> Cl <sub>2</sub> ·6H <sub>2</sub> O | TBHP                                         | Na <sub>2</sub> CO <sub>3</sub> | MeCN    | 54                       |
| 5     | Ru(bpy) <sub>3</sub> Cl <sub>2</sub> ·6H <sub>2</sub> O | DTBP                                         | Na <sub>2</sub> CO <sub>3</sub> | MeCN    | 10                       |

<sup>[a]</sup> The reaction was performed with **1a** (0.2 mmol), **2a** (1.3 equiv.), Oxidant (2.0 equiv.), Na<sub>2</sub>CO<sub>3</sub> (1.3 equiv.), Ru(bpy)<sub>3</sub>Cl<sub>2</sub>·6H<sub>2</sub>O (2 mol%) in MeCN (2.0 mL) was irradiated by 5 W blue LEDs under Ar at rt for 24 h. <sup>[b]</sup> The yields were determined based on crude <sup>1</sup>H NMR spectroscopy using 1,3,5-trimethoxybenzene as the internal standard. <sup>[c]</sup> TBHP 70% solution in H<sub>2</sub>O.

**Table S3.** Optimization of the Base<sup>[a]</sup>

| Entry | Photocatalyst                                           | Oxidant | Base                            | Solvent | Yield (%) <sup>[b]</sup> |
|-------|---------------------------------------------------------|---------|---------------------------------|---------|--------------------------|
| 1     | Ru(bpy) <sub>3</sub> Cl <sub>2</sub> ·6H <sub>2</sub> O | TBPB    | NaHCO <sub>3</sub>              | MeCN    | 60                       |
| 2     | Ru(bpy) <sub>3</sub> Cl <sub>2</sub> ·6H <sub>2</sub> O | TBPB    | K <sub>2</sub> CO <sub>3</sub>  | MeCN    | 56                       |
| 3     | Ru(bpy) <sub>3</sub> Cl <sub>2</sub> ·6H <sub>2</sub> O | TBPB    | K <sub>3</sub> PO <sub>4</sub>  | MeCN    | 78                       |
| 4     | Ru(bpy) <sub>3</sub> Cl <sub>2</sub> ·6H <sub>2</sub> O | TBPB    | DABCO                           | MeCN    | 34                       |
| 5     | Ru(bpy) <sub>3</sub> Cl <sub>2</sub> ·6H <sub>2</sub> O | TBPB    | Li <sub>2</sub> CO <sub>3</sub> | MeCN    | 57                       |
| 6     | Ru(bpy) <sub>3</sub> Cl <sub>2</sub> ·6H <sub>2</sub> O | TBPB    | KH <sub>2</sub> PO <sub>4</sub> | MeCN    | 70                       |
| 7     | Ru(bpy) <sub>3</sub> Cl <sub>2</sub> ·6H <sub>2</sub> O | TBPB    | K <sub>2</sub> HPO <sub>4</sub> | MeCN    | 62                       |
| 8     | Ru(bpy) <sub>3</sub> Cl <sub>2</sub> ·6H <sub>2</sub> O | TBPB    | Et <sub>3</sub> N               | MeCN    | 31                       |
| 7     | Ru(bpy) <sub>3</sub> Cl <sub>2</sub> ·6H <sub>2</sub> O | TBPB    | 2,6-Lutidine                    | MeCN    | 68                       |
| 8     | Ru(bpy) <sub>3</sub> Cl <sub>2</sub> ·6H <sub>2</sub> O | TBPB    | —                               | MeCN    | 21                       |

<sup>[a]</sup> The reaction was performed with **1a** (0.2 mmol), **2a** (1.3 equiv.), TBPB (2.0 equiv.), Base (1.3 equiv.), Ru(bpy)<sub>3</sub>Cl<sub>2</sub>·6H<sub>2</sub>O (2 mol%) in MeCN (2.0 mL) was irradiated by 5 W blue LEDs under Ar at rt for 24 h. <sup>[b]</sup> The yields were determined based on crude <sup>1</sup>H NMR spectroscopy using 1,3,5-trimethoxybenzene as the internal standard.

**Table S4.** Optimization of the Photocatalyst and Control Experiment <sup>[a]</sup>

| Entry            | Photocatalyst                                           | Oxidant | Base                            | Solvent | Yield (%) <sup>[b]</sup> |
|------------------|---------------------------------------------------------|---------|---------------------------------|---------|--------------------------|
| 1                | —                                                       | TBPB    | Na <sub>2</sub> CO <sub>3</sub> | MeCN    | trace                    |
| 2                | <i>fac</i> -Ir(ppy) <sub>3</sub>                        | TBPB    | Na <sub>2</sub> CO <sub>3</sub> | MeCN    | 41                       |
| 3                | Acid Red 94                                             | TBPB    | Na <sub>2</sub> CO <sub>3</sub> | MeCN    | 73                       |
| 4                | Rhodamine B                                             | TBPB    | Na <sub>2</sub> CO <sub>3</sub> | MeCN    | trace                    |
| 5 <sup>[c]</sup> | Ru(bpy) <sub>3</sub> Cl <sub>2</sub> ·6H <sub>2</sub> O | TBPB    | Na <sub>2</sub> CO <sub>3</sub> | MeCN    | trace                    |
| 6 <sup>[d]</sup> | Ru(bpy) <sub>3</sub> Cl <sub>2</sub> ·6H <sub>2</sub> O | TBPB    | Na <sub>2</sub> CO <sub>3</sub> | MeCN    | 57                       |

<sup>[a]</sup> The reaction was performed with **1a** (0.2 mmol), **2a** (1.3 equiv.), TBPB (2.0 equiv.), Na<sub>2</sub>CO<sub>3</sub> (1.3 equiv.), photocatalyst (2

mol%) in MeCN (2.0 mL) was irradiated by 5 W blue LEDs under Ar at rt for 24 h. <sup>[b]</sup> The yields were determined based on crude <sup>1</sup>H NMR spectroscopy using 1,3,5-trimethoxybenzene as the internal standard. <sup>[c]</sup> No irradiation. <sup>[d]</sup> Sunlight instead of blue LEDs.

### 3. The General Procedures

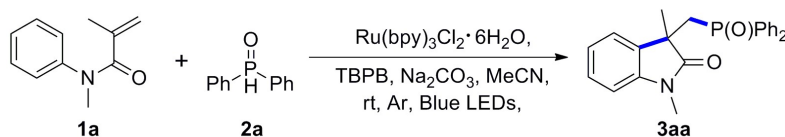

To a Schlenk tube were added *N*-arylacrylamides **1a** (0.2 mmol, 1.0 equiv.), diphenylphosphine oxide **2a** (0.26 mmol, 1.3 equiv.), Ru(bpy)<sub>3</sub>Cl<sub>2</sub>·6H<sub>2</sub>O (2 mol%), Na<sub>2</sub>CO<sub>3</sub> (0.26 mmol, 1.3 equiv) and charged with argon for three times. TBPB (2.0 equiv.) and MeCN (2.0 mL) was added and the mixture was then irradiated by blue LED strips at room temperature for 24 h. After substrate was consumed (monitored by TLC), the reaction was concentrated in vacuo, and the resulting residue was purified by column chromatography (PE/*i*-PrOH = 20/1) to give the desired phosphorylated oxindoles derivatives **3**.

### 4. Preliminary mechanistic studies.

#### 4.1 Radicals Trapping Experiments using TEMPO

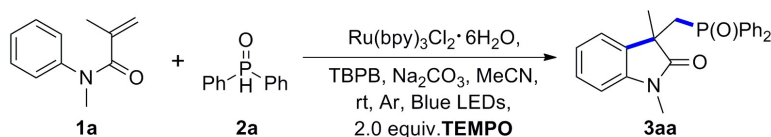

In a Schlenk tube, *N*-arylacrylamides **1** (0.2 mmol, 1.0 equiv.), diphenylphosphine oxide (0.26 mmol, 1.3 equiv.), Ru(bpy)<sub>3</sub>Cl<sub>2</sub>·6H<sub>2</sub>O (2 mol%), Na<sub>2</sub>CO<sub>3</sub> (0.26 mmol, 1.3 equiv) and TEMPO (1.0 equiv) were added and charged with Ar three times. Then, TBPB (2.0 equiv.) and MeCN (2.0 mL) were added and the mixture was then irradiated by blue LED strips at room temperature for 24 h (monitored by TLC). However, no desired product **3** is generated.

#### 4.2 Radicals Trapping Experiments using 1,1-Diphenylethylene

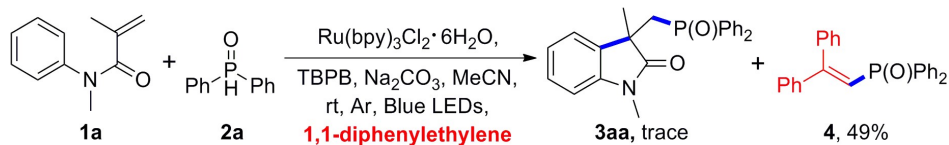

In a Schlenk tube, *N*-arylacrylamides **1a** (0.2 mmol, 1.0 equiv.), diphenylphosphine oxide **2a** (0.26 mmol, 1.3 equiv.), Ru(bpy)<sub>3</sub>Cl<sub>2</sub>·6H<sub>2</sub>O (2 mol%), Na<sub>2</sub>CO<sub>3</sub> (0.26 mmol, 1.3 equiv) and 1,1-diphenylethylene (1.0 equiv) were added and charged with Ar three times. Then, MeCN (2.0 mL) and TBPB (2.0 equiv.) were added and the mixture was then irradiated by blue LED strips at room temperature for 24 h. After substrate was consumed (monitored by TLC), the reaction was concentrated in vacuo, and the resulting residue was purified by column chromatography to give **3aa** and **4** in trace and 49% yield, respectively. The result show that the reaction system produces the diphenylphosphine oxide radical.

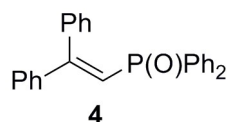

**(2,2-diphenylvinyl)diphenylphosphine oxide**, white solid,  $^1\text{H}$  NMR (400 MHz,  $\text{CDCl}_3$ )  $\delta$  7.79 – 7.61 (m, 4H), 7.38 – 7.28 (m, 10H), 7.25 – 7.21 (m, 2H), 7.10 (dt,  $J = 14.2, 6.9$  Hz, 4H), 6.79 (d,  $J = 18.2$  Hz, 1H).  $^{13}\text{C}$  NMR (101 MHz,  $\text{CDCl}_3$ )  $\delta$  161.9, 141.9, 141.7, 137.9, 137.9, 134.8, 133.7, 131.0, 130.9, 130.8, 130.7, 130.2, 129.4, 128.5, 128.3, 128.2, 128.2, 128.1, 127.5, 120.9, 119.9.  $^{31}\text{P}$  NMR (162 MHz,  $\text{CDCl}_3$ )  $\delta$  18.73. MS (ESI,  $m/z$ ): calculated for  $\text{C}_{26}\text{H}_{21}\text{OP}$   $[\text{M}+\text{H}]^+$ : 381.1403, found: 381.4. Spectral data for this compound is consistent with that previously reported.<sup>[S1j]</sup>

## 5. References

[S1] (a) Y.-M. Li, Y. Shen, K.-J. Chang and S.-D. Yang, *Tetrahedron*, **2014**, 70, 1991; (b) Y.-M. Li, M. Sun, H.-L. Wang, Q.-P. Tian and S.-D. Yang, *Angew. Chem. Int. Ed.* **2013**, 52, 3972. (c) C. X. Li, D. S. Tu, R. Yao, H. Yan and C. S. Lu, *Org. Lett.*, **2016**, 18, 4928. (d) A. Pinto, Y. Jia, L. Neuville and J. Zhu, *Chem. Eur. J.* **2007**, 13, 961. (e) H. Wei, T. Piou, J. Dufour, L. Neuville and J. Zhu, *Org. Lett.*, **2011**, 13, 2244. (f) X. Mu, T. Wu, H. Wang, Y. Guo and G. Liu, *J. Am. Chem. Soc.* **2012**, 134, 878. (g) S. Biro, R. Yeh and K. Raymond, *Angew. Chem., Int. Ed.* **2008**, 47, 6062. (h) N. Campbell, A. Finch and S. Rokita, *ChemPhysChem* **2010**, 11, 1768. (i) C. Chen, W. Sun, Y. Yan, F. Yang, Y. Wang, Y. -P. Zhu, L. Liu and B. Zhu, *Adv. Syn. Cat.*, **2020**, 362, 2970, (j) L.-L. Mao, A.-X. Zhou, N. Liu and S.-D. Yang, *Synlett*, **2014**, 25, 2727.

## 6. Characterization data of products

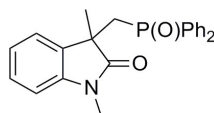

**3-((diphenylphosphoryl)methyl)-1,3-dimethylindolin-2-one (3aa)** White solid;  $^1\text{H}$  NMR (400 MHz,  $\text{CDCl}_3$ )  $\delta$  7.62 – 7.55 (m, 2H), 7.51 – 7.46 (m, 2H), 7.44 – 7.29 (m, 6H), 7.17 (dd,  $J = 10.7, 4.1$  Hz, 2H), 6.85 – 6.75 (m, 1H), 6.67 (d,  $J = 8.1$  Hz, 1H), 3.09 (dd,  $J = 15.2, 10.1$  Hz, 1H), 3.01 (s, 3H), 2.87 (dd,  $J = 15.2, 10.9$  Hz, 1H), 1.43 (d,  $J = 1.7$  Hz, 3H).  $^{13}\text{C}$  NMR (101 MHz,  $\text{CDCl}_3$ )  $\delta$  179.4 (d,  $J = 4.3$  Hz), 142.9, 133.9 (d,  $J = 76.7$  Hz), 132.9 (d,  $J = 76.1$  Hz), 131.4 (d,  $J = 2.7$  Hz), 131.3 (d,  $J = 2.6$  Hz), 131.2 (d,  $J = 2.8$  Hz), 130.6 (d,  $J = 9.4$  Hz), 130.4 (d,  $J = 9.2$  Hz), 128.3 (d,  $J = 11.7$  Hz), 128.1 (d,  $J = 11.7$  Hz), 127.9, 124.8, 122.1, 107.8, 45.4 (d,  $J = 3.8$  Hz), 37.5 (d,  $J = 71.8$  Hz), 26.8 (d,  $J = 12.1$  Hz), 26.3.  $^{31}\text{P}$  NMR (162 MHz,  $\text{CDCl}_3$ )  $\delta$  26.02. MS (ESI,  $m/z$ ): calculated for  $\text{C}_{23}\text{H}_{22}\text{NO}_2\text{P}$   $[\text{M}+\text{H}]^+$ : 376.1461, found: 376.1. Spectral data for this compound is consistent with that previously reported.<sup>[S1b]</sup>

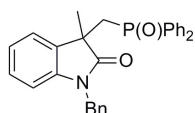

**1-benzyl-3-((diphenylphosphoryl)methyl)-3-methylindolin-2-one (3ab)** White solid;  $^1\text{H}$  NMR (400 MHz,  $\text{CDCl}_3$ )  $\delta$  7.58 (m, 4H), 7.43 (t,  $J = 7.2$  Hz, 2H), 7.36 (m, 4H), 7.28 (t,  $J = 6.3$  Hz, 4H), 7.24 (dd,  $J = 6.2, 2.0$  Hz, 1H), 7.19 (d,  $J = 7.4$  Hz, 1H), 7.03 (t,  $J = 7.7$  Hz, 1H), 6.73 (t,  $J = 7.5$  Hz, 1H), 6.55 (d,  $J = 7.8$  Hz, 1H), 5.04 (d,  $J = 15.8$  Hz, 1H), 4.40 (d,  $J = 15.8$  Hz, 1H), 3.09 (dd,  $J = 15.2, 10.9$  Hz, 1H), 2.93 (dd,  $J = 15.2, 10.0$  Hz, 1H), 1.49 (s, 3H).  $^{13}\text{C}$  NMR (101 MHz,  $\text{CDCl}_3$ )  $\delta$  179.6 (d,  $J = 5.2$  Hz), 142.0, 136.1, 133.9 (d,  $J = 38.0$  Hz), 132.9 (d,  $J = 37.6$  Hz), 131.6 (d,  $J = 2.7$  Hz), 131.4 (d,  $J = 2.8$  Hz),

131.3 (d,  $J = 2.7$  Hz), 130.7 (d,  $J = 9.4$  Hz), 130.6 (d,  $J = 9.2$  Hz), 128.7, 128.4 (d,  $J = 11.8$  Hz), 128.2 (d,  $J = 11.8$  Hz), 127.8, 127.4, 127.1, 124.9, 122.2, 108.9, 45.6 (d,  $J = 3.9$  Hz), 43.9, 37.3 (d,  $J = 71.5$  Hz), 26.9 (d,  $J = 11.4$  Hz).  **$^{31}\text{P}$  NMR (162 MHz,  $\text{CDCl}_3$ )**  $\delta$  26.20. **MS (ESI,  $m/z$ ):** calculated for  $\text{C}_{29}\text{H}_{26}\text{NO}_2\text{P}$   $[\text{M}+\text{H}]^+$ : 452.1774, found: 452.2. Spectral data for this compound is consistent with that previously reported. <sup>[S1c]</sup>

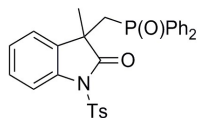

**3-((diphenylphosphoryl)methyl)-3-methyl-1-tosylindolin-2-one (3ac)** White solid;  **$^1\text{H}$  NMR (400 MHz,  $\text{CDCl}_3$ )**  $\delta$  8.48 (s, 1H), 7.70 – 7.60 (m, 2H), 7.49 – 7.40 (m, 5H), 7.36 (m, 3H), 7.25 (dd,  $J = 9.5$ , 6.0 Hz, 4H), 7.09 (d,  $J = 8.2$  Hz, 2H), 7.04 (t,  $J = 7.3$  Hz, 1H), 6.81 (d,  $J = 8.1$  Hz, 2H), 3.26 (dd,  $J = 15.6$ , 12.2 Hz, 1H), 3.09 (dd,  $J = 15.6$ , 8.5 Hz, 1H), 2.18 (s, 3H), 1.96 (s, 3H).  **$^{13}\text{C}$  NMR (101 MHz,  $\text{CDCl}_3$ )**  $\delta$  174.4 (d,  $J = 9.4$  Hz), 138.2 (d,  $J = 6.0$  Hz), 136.9, 134.2 (d,  $J = 100.3$  Hz), 132.9 (d,  $J = 99.6$  Hz), 131.3 (d,  $J = 2.7$  Hz), 130.7 (d,  $J = 2.7$  Hz), 130.5, 130.4, 130.3, 130.2, 128.9, 128.7, 128.4 (d,  $J = 11.7$  Hz), 128.1 (d,  $J = 11.8$  Hz), 127.0, 123.9, 119.7, 50.5 (d,  $J = 2.7$  Hz), 39.3 (d,  $J = 71.2$  Hz), 25.8 (d,  $J = 5.0$  Hz), 20.8.  **$^{31}\text{P}$  NMR (162 MHz,  $\text{CDCl}_3$ )**  $\delta$  28.69. **MS (ESI,  $m/z$ ):** calculated for  $\text{C}_{29}\text{H}_{26}\text{NO}_4\text{PS}$   $[\text{M}+\text{H}]^+$ : 516.1393, found: 516.0. Spectral data for this compound is consistent with that previously reported. <sup>[S1b]</sup>

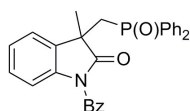

**1-benzoyl-3-((diphenylphosphoryl)methyl)-3-methylindolin-2-one (3ad)** White solid; M.p. = 228–230 °C,  **$^1\text{H}$  NMR (400 MHz,  $\text{CDCl}_3$ )**  $\delta$  8.18 (d,  $J = 7.8$  Hz, 1H), 7.60 (dd,  $J = 11.5$ , 7.4 Hz, 2H), 7.49 (dd,  $J = 14.0$ , 6.7 Hz, 3H), 7.46 – 7.26 (m, 8H), 7.26 – 7.15 (m, 3H), 7.00 (d,  $J = 3.6$  Hz, 2H), 3.79 (dd,  $J = 14.7$ , 12.5 Hz, 1H), 2.97 (dd,  $J = 14.9$ , 5.9 Hz, 1H), 1.79 (d,  $J = 1.6$  Hz, 3H).  **$^{13}\text{C}$  NMR (101 MHz,  $\text{CDCl}_3$ )**  $\delta$  175.9, 164.1, 140.7, 136.0, 133.8 (d,  $J = 99.7$  Hz), 132.7, 132.2 (d,  $J = 99.0$  Hz), 131.4 (d,  $J = 75.8$  Hz), 131.3 (d,  $J = 81.3$  Hz), 130.8, 130.7, 130.6, 129.1, 128.9, 128.6, 128.5, 128.3, 128.2 (d,  $J = 18.2$  Hz), 127.5, 126.2, 125.0, 45.4 (d,  $J = 3.7$  Hz), 41.8 (d,  $J = 70.0$  Hz), 32.8 (d,  $J = 13.8$  Hz).  **$^{31}\text{P}$  NMR (162 MHz,  $\text{CDCl}_3$ )**  $\delta$  27.09. **HRMS (ESI,  $m/z$ ):** calculated for  $\text{C}_{29}\text{H}_{24}\text{NO}_3\text{P}$   $(\text{M}+\text{Na})^+$ , 488.1386; found, 488.1384.

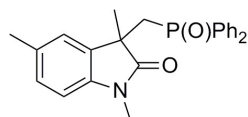

**3-((diphenylphosphoryl)methyl)-1,3,5-trimethylindolin-2-one (3af)** Light yellow solid;  **$^1\text{H}$  NMR (400 MHz,  $\text{CDCl}_3$ )**  $\delta$  7.57 – 7.46 (m, 4H), 7.40 (t,  $J = 7.1$  Hz, 2H), 7.37 – 7.28 (m, 4H), 6.93 (d,  $J = 7.8$  Hz, 1H), 6.78 (s, 1H), 6.59 (d,  $J = 7.9$  Hz, 1H), 3.14 – 3.02 (m, 4H), 2.82 (dd,  $J = 15.1$ , 9.5 Hz, 1H), 2.06 (s, 3H), 1.43 (s, 3H).  **$^{13}\text{C}$  NMR (101 MHz,  $\text{CDCl}_3$ )**  $\delta$  179.3 (d,  $J = 4.1$  Hz), 140.7, 133.9 (d,  $J = 23.7$  Hz), 132.9 (d,  $J = 23.2$  Hz), 131.3 (d,  $J = 2.6$  Hz), 131.2, 131.1 (d,  $J = 2.7$  Hz), 130.9 (d,  $J = 2.7$  Hz), 130.5 (d,  $J = 9.3$  Hz), 130.4 (d,  $J = 9.2$  Hz), 128.1 (d,  $J = 1.9$  Hz), 128.1, 128.0 (d,  $J = 5.7$  Hz), 125.4, 107.5, 45.3 (d,  $J = 3.9$  Hz), 37.5 (d,  $J = 71.7$  Hz), 26.6 (d,  $J = 12.1$  Hz), 26.3, 20.8.  **$^{31}\text{P}$  NMR (162 MHz,  $\text{CDCl}_3$ )**  $\delta$  25.71. **MS (ESI,  $m/z$ ):** calculated for  $\text{C}_{24}\text{H}_{24}\text{NO}_2\text{P}$   $[\text{M}+\text{H}]^+$ : 390.1617, found: 390.2. Spectral data for this compound is consistent with that previously reported. <sup>[S1a]</sup>

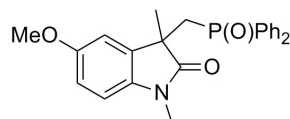

**3-((diphenylphosphoryl)methyl)-5-methoxy-1,3-dimethylindolin-2-one (3ag)** White solid;  $^1\text{H}$  NMR (400 MHz,  $\text{CDCl}_3$ )  $\delta$  7.59 – 7.48 (m, 4H), 7.41 (m, 2H), 7.39 – 7.29 (m, 4H), 6.75 (d,  $J$  = 2.4 Hz, 1H), 6.70 (dd,  $J$  = 8.4, 2.5 Hz, 1H), 6.59 (d,  $J$  = 8.4 Hz, 1H), 3.64 (s, 3H), 3.15 – 3.01 (m, 4H), 2.82 (dd,  $J$  = 15.2, 9.9 Hz, 1H), 1.43 (d,  $J$  = 1.3 Hz, 3H).  $^{13}\text{C}$  NMR (101 MHz,  $\text{CDCl}_3$ )  $\delta$  179.1 (d,  $J$  = 4.2 Hz), 155.4, 136.5, 133.9 (d,  $J$  = 50.5 Hz), 132.9 (d,  $J$  = 50.2 Hz), 132.5 (d,  $J$  = 2.6 Hz), 131.4 (d,  $J$  = 2.5 Hz), 131.2 (d,  $J$  = 2.6 Hz), 130.6 (d,  $J$  = 9.4 Hz), 130.5 (d,  $J$  = 9.3 Hz), 128.3 (d,  $J$  = 6.9 Hz), 128.2 (d,  $J$  = 6.9 Hz), 113.2, 111.5, 108.2, 55.5, 45.9 (d,  $J$  = 3.8 Hz), 37.4 (d,  $J$  = 71.6 Hz), 26.7 (d,  $J$  = 12.3 Hz), 26.4.  $^{31}\text{P}$  NMR (162 MHz,  $\text{CDCl}_3$ )  $\delta$  26.02. MS (ESI,  $m/z$ ): calculated for  $\text{C}_{24}\text{H}_{24}\text{NO}_3\text{P}$   $[\text{M}+\text{H}]^+$ : 406.1567, found: 406.0. Spectral data for this compound is consistent with that previously reported. <sup>[S1b]</sup>

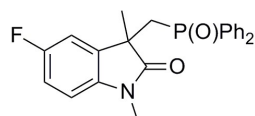

**3-((diphenylphosphoryl)methyl)-5-fluoro-1,3-dimethylindolin-2-one (3ah)** Light yellow solid;  $^1\text{H}$  NMR (400 MHz,  $\text{CDCl}_3$ )  $\delta$  7.63 – 7.49 (m, 4H), 7.43 (m, 2H), 7.39 – 7.32 (m, 4H), 6.85 (m, 1H), 6.79 (dd,  $J$  = 8.2, 2.4 Hz, 1H), 6.63 (dd,  $J$  = 8.5, 4.1 Hz, 1H), 3.16 – 3.00 (m, 4H), 2.83 (dd,  $J$  = 15.1, 9.2 Hz, 1H), 1.42 (s, 3H).  $^{13}\text{C}$  NMR (101 MHz,  $\text{CDCl}_3$ )  $\delta$  178.9 (d,  $J$  = 4.3 Hz), 158.6 (d,  $J$  = 240.2 Hz), 138.9 (d,  $J$  = 1.8 Hz), 133.6 (d,  $J$  = 16.2 Hz), 132.9 (d,  $J$  = 2.7 Hz), 132.8 (d,  $J$  = 2.6 Hz), 132.7 (d,  $J$  = 16.1 Hz), 131.4 (d,  $J$  = 2.7 Hz), 131.3 (d,  $J$  = 2.7 Hz), 130.4 (d,  $J$  = 9.4 Hz), 130.3 (d,  $J$  = 9.2 Hz), 128.3 (d,  $J$  = 6.5 Hz), 128.2 (d,  $J$  = 6.5 Hz), 114.1 (d,  $J$  = 23.5 Hz), 112.7 (d,  $J$  = 25.2 Hz), 108.1 (d,  $J$  = 8.1 Hz), 45.7 (d,  $J$  = 2.2 Hz), 37.4 (d,  $J$  = 71.3 Hz), 26.4, 26.3.  $^{31}\text{P}$  NMR (162 MHz,  $\text{CDCl}_3$ )  $\delta$  25.59.  $^{19}\text{F}$  NMR (376 MHz,  $\text{CDCl}_3$ )  $\delta$  -121.23. MS (ESI,  $m/z$ ): calculated for  $\text{C}_{23}\text{H}_{21}\text{FNO}_2\text{P}$   $[\text{M}+\text{H}]^+$ : 394.1367, found: 394.4. Spectral data for this compound is consistent with that previously reported. <sup>[S1b]</sup>

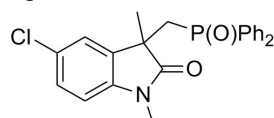

**5-chloro-3-((diphenylphosphoryl)methyl)-1,3-dimethylindolin-2-one (3ai)** White solid;  $^1\text{H}$  NMR (400 MHz,  $\text{CDCl}_3$ )  $\delta$  7.61 – 7.52 (m, 2H), 7.49 – 7.39 (m, 4H), 7.39 – 7.29 (m, 4H), 7.08 (dd,  $J$  = 8.3, 2.1 Hz, 1H), 6.81 (d,  $J$  = 2.1 Hz, 1H), 6.64 (d,  $J$  = 8.3 Hz, 1H), 3.17 – 3.01 (m, 4H), 2.77 (dd,  $J$  = 15.1, 8.3 Hz, 1H), 1.40 (d,  $J$  = 1.8 Hz, 3H).  $^{13}\text{C}$  NMR (101 MHz,  $\text{CDCl}_3$ )  $\delta$  178.9 (d,  $J$  = 3.7 Hz), 141.9, 133.6 (d,  $J$  = 41.1 Hz), 132.8 (d,  $J$  = 2.9 Hz), 132.6 (d,  $J$  = 35.6 Hz), 131.6 (d,  $J$  = 2.7 Hz), 131.5 (d,  $J$  = 2.7 Hz), 130.4 (d,  $J$  = 9.4 Hz), 130.3 (d,  $J$  = 9.3 Hz), 128.4 (d,  $J$  = 6.0 Hz), 128.3 (d,  $J$  = 6.1 Hz), 127.9, 127.2, 125.0, 108.7, 45.5 (d,  $J$  = 4.0 Hz), 37.6 (d,  $J$  = 71.3 Hz), 26.6, 26.5.  $^{31}\text{P}$  NMR (162 MHz,  $\text{CDCl}_3$ )  $\delta$  25.52. MS (ESI,  $m/z$ ): calculated for  $\text{C}_{23}\text{H}_{21}\text{ClNO}_2\text{P}$   $[\text{M}+\text{H}]^+$ : 410.1071, found: 410.2. Spectral data for this compound is consistent with that previously reported. <sup>[S1b]</sup>

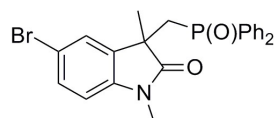

**5-bromo-3-((diphenylphosphoryl)methyl)-1,3-dimethylindolin-2-one (3aj)** White solid;  $^1\text{H}$  NMR (400 MHz,  $\text{CDCl}_3$ )  $\delta$  7.62 – 7.53 (m, 2H), 7.47 – 7.39 (m, 4H), 7.39 – 7.29 (m, 4H), 7.25 – 7.19 (m, 1H), 6.92 (d,  $J$  = 1.9 Hz, 1H), 6.60 (d,  $J$  = 8.3 Hz, 1H), 3.18 – 3.01 (m, 4H), 2.76 (dd,  $J$  = 15.1, 8.1 Hz,



1H), 1.40 (d,  $J = 1.5$  Hz, 3H).  $^{13}\text{C}$  NMR (101 MHz,  $\text{CDCl}_3$ )  $\delta$  178.8 (d,  $J = 3.5$  Hz), 142.4, 133.6 (d,  $J = 56.2$  Hz), 133.1 (d,  $J = 2.7$  Hz), 132.6 (d,  $J = 56.3$  Hz), 131.6 (d,  $J = 1.7$  Hz), 130.8, 130.4 (d,  $J = 9.4$  Hz), 130.2 (d,  $J = 9.3$  Hz), 128.4 (d,  $J = 6.3$  Hz), 128.3 (d,  $J = 6.3$  Hz), 127.7, 114.6, 109.3, 45.5 (d,  $J = 4.0$  Hz), 37.6 (d,  $J = 71.2$  Hz), 26.5, 26.5 (d,  $J = 12.1$  Hz).  $^{31}\text{P}$  NMR (162 MHz,  $\text{CDCl}_3$ )  $\delta$  25.54. MS (ESI,  $m/z$ ): calculated for  $\text{C}_{23}\text{H}_{21}\text{BrNO}_2\text{P}$   $[\text{M}+\text{H}]^+$ : 454.0566, found: 454.5. Spectral data for this compound is consistent with that previously reported. <sup>[S1b]</sup>

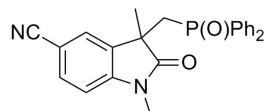

**3-((diphenylphosphoryl)methyl)-1,3-dimethyl-2-oxoindoline-5-carbonitrile (3ak)** White solid;  $^1\text{H}$  NMR (400 MHz,  $\text{CDCl}_3$ )  $\delta$  7.61 – 7.53 (m, 2H), 7.50 – 7.29 (m, 9H), 6.88 (d,  $J = 1.2$  Hz, 1H), 6.79 (d,  $J = 8.2$  Hz, 1H), 3.24 – 3.03 (m, 4H), 2.80 (dd,  $J = 15.1, 7.0$  Hz, 1H), 1.41 (d,  $J = 1.6$  Hz, 3H).  $^{13}\text{C}$  NMR (101 MHz,  $\text{CDCl}_3$ )  $\delta$  179.1 (d,  $J = 2.9$  Hz), 147.3, 133.3 (d,  $J = 75.5$  Hz), 133.1, 132.3 (d,  $J = 74.9$  Hz), 131.8 (d,  $J = 2.7$  Hz), 131.7 (d,  $J = 2.8$  Hz), 131.7 (d,  $J = 2.8$  Hz), 130.2 (d,  $J = 10.1$  Hz), 130.1, 128.4 (d,  $J = 9.1$  Hz), 128.3 (d,  $J = 9.1$  Hz), 127.5, 118.8, 108.3, 104.7, 44.9 (d,  $J = 4.0$  Hz), 37.7 (d,  $J = 71.1$  Hz), 26.7, 26.2 (d,  $J = 12.5$  Hz).  $^{31}\text{P}$  NMR (162 MHz,  $\text{CDCl}_3$ )  $\delta$  25.25. MS (ESI,  $m/z$ ): calculated for  $\text{C}_{24}\text{H}_{21}\text{N}_2\text{O}_2\text{P}$   $[\text{M}+\text{H}]^+$ : 401.1413, found: 401.0. Spectral data for this compound is consistent with that previously reported. <sup>[S1b]</sup>

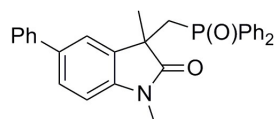

**3-((diphenylphosphoryl)methyl)-1,3-dimethyl-5-phenylindolin-2-one (3al)** White solid;  $^1\text{H}$  NMR (400 MHz,  $\text{CDCl}_3$ )  $\delta$  7.56 – 7.46 (m, 4H), 7.45 – 7.35 (m, 6H), 7.34 – 7.25 (m, 7H), 6.75 (d,  $J = 8.1$  Hz, 1H), 3.20 (dd,  $J = 15.2, 10.6$  Hz, 1H), 3.09 (s, 3H), 2.93 (dd,  $J = 15.2, 10.2$  Hz, 1H), 1.48 (s, 3H).  $^{13}\text{C}$  NMR (101 MHz,  $\text{CDCl}_3$ )  $\delta$  179.5 (d,  $J = 3.4$  Hz), 142.6, 140.6, 135.3, 133.2 (d,  $J = 45.8$  Hz), 132.2 (d,  $J = 45.4$  Hz), 131.7 (d,  $J = 2.9$  Hz), 131.5 (d,  $J = 2.6$  Hz), 131.5 (d,  $J = 2.7$  Hz), 130.7 (d,  $J = 9.5$  Hz), 130.4 (d,  $J = 9.4$  Hz), 128.5, 128.3 (d,  $J = 7.4$  Hz), 128.2 (d,  $J = 7.4$  Hz), 126.8, 126.7 (d,  $J = 9.2$  Hz), 123.8, 108.1, 45.5 (d,  $J = 3.8$  Hz), 37.5 (d,  $J = 71.6$  Hz), 27.1 (d,  $J = 12.4$  Hz), 26.5.  $^{31}\text{P}$  NMR (162 MHz,  $\text{CDCl}_3$ )  $\delta$  27.40. MS (ESI,  $m/z$ ): calculated for  $\text{C}_{29}\text{H}_{26}\text{NO}_2\text{P}$   $[\text{M}+\text{H}]^+$ : 452.1774, found: 452.3. Spectral data for this compound is consistent with that previously reported. <sup>[S1c]</sup>

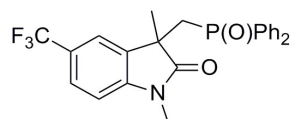

**3-((diphenylphosphoryl)methyl)-1,3-dimethyl-5-(trifluoromethyl)indolin-2-one (3am)** White solid;  $^1\text{H}$  NMR (400 MHz,  $\text{CDCl}_3$ )  $\delta$  7.61 – 7.54 (m, 2H), 7.47 – 7.33 (m, 7H), 7.29 (td,  $J = 7.3, 2.8$  Hz, 2H), 7.08 (s, 1H), 6.82 (d,  $J = 8.2$  Hz, 1H), 3.30 – 3.08 (m, 4H), 2.86 (dd,  $J = 15.1, 7.8$  Hz, 1H), 1.46 (d,  $J = 1.7$  Hz, 3H).  $^{13}\text{C}$  NMR (101 MHz,  $\text{CDCl}_3$ )  $\delta$  179.46 (d,  $J = 3.2$  Hz), 146.40, 133.59 (d,  $J = 74.8$  Hz), 132.60 (d,  $J = 74.6$  Hz), 131.56 (d,  $J = 2.5$  Hz), 131.47 (d,  $J = 2.7$  Hz), 130.34 (d,  $J = 9.4$  Hz), 130.10 (d,  $J = 9.3$  Hz), 128.39 (d,  $J = 6.8$  Hz), 128.27 (d,  $J = 7.0$  Hz), 125.81 (dd,  $J = 11.4, J = 3.8$  Hz), 124.71 (d,  $J = 136.6$  Hz), 123.20 (d,  $J = 102.5$  Hz), 121.14 (dd,  $J = 11.4, J = 3.8$  Hz), 107.73, 45.22 (d,  $J = 4.0$  Hz), 37.66 (d,  $J = 71.2$  Hz), 26.65, 26.52.  $^{31}\text{P}$  NMR (162 MHz,  $\text{CDCl}_3$ )  $\delta$  25.36.  $^{19}\text{F}$  NMR (376 MHz,  $\text{CDCl}_3$ )  $\delta$  -61.10. MS (ESI,  $m/z$ ): calculated for  $\text{C}_{24}\text{H}_{21}\text{F}_3\text{NO}_2\text{P}$   $[\text{M}+\text{H}]^+$ : 444.1335, found: 444.6. Spectral data for this compound is consistent with that previously reported. <sup>[S1c]</sup>



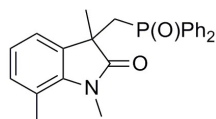

**3-((diphenylphosphoryl)methyl)-1,3,7-trimethylindolin-2-one (3an)** Light yellow solid;  $^1\text{H}$  NMR (400 MHz,  $\text{CDCl}_3$ )  $\delta$  7.62 – 7.55 (m, 2H), 7.47 – 7.38 (m, 4H), 7.33 (tdd,  $J = 7.2, 5.3, 2.4$  Hz, 4H), 7.00 (d,  $J = 7.3$  Hz, 1H), 6.88 (d,  $J = 7.6$  Hz, 1H), 6.69 (t,  $J = 7.6$  Hz, 1H), 3.24 (s, 3H), 3.18 – 3.08 (m, 1H), 2.83 (dd,  $J = 15.2, 11.7$  Hz, 1H), 2.45 (s, 3H), 1.40 (d,  $J = 1.9$  Hz, 3H).  $^{13}\text{C}$  NMR (101 MHz,  $\text{CDCl}_3$ )  $\delta$  180.0 (d,  $J = 3.4$  Hz), 140.6, 133.2 (d,  $J = 197.1$  Hz), 133.2, 131.8 (d,  $J = 2.9$  Hz), 131.6, 131.2 (d,  $J = 8.0$  Hz), 131.1 (d,  $J = 2.3$  Hz), 130.6 (d,  $J = 47.3$  Hz), 130.6 (d,  $J = 28.7$  Hz), 128.3 (d,  $J = 11.7$  Hz), 127.9 (d,  $J = 11.8$  Hz), 122.6, 122.0, 119.2, 44.7 (d,  $J = 3.7$  Hz), 37.8 (d,  $J = 71.2$  Hz), 29.6, 27.4 (d,  $J = 12.5$  Hz), 18.9.  $^{31}\text{P}$  NMR (162 MHz,  $\text{CDCl}_3$ )  $\delta$  25.82. MS (ESI,  $m/z$ ): calculated for  $\text{C}_{24}\text{H}_{24}\text{NO}_2\text{P}$   $[\text{M}+\text{H}]^+$ : 390.1617, found: 390.2. Spectral data for this compound is consistent with that previously reported. <sup>[S1b]</sup>

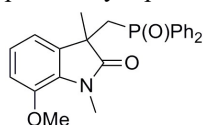

**3-((diphenylphosphoryl)methyl)-7-methoxy-1,3-dimethylindolin-2-one (3ao)** Light yellow solid;  $^1\text{H}$  NMR (400 MHz,  $\text{CDCl}_3$ )  $\delta$  7.68 – 7.58 (m, 2H), 7.48 (dd,  $J = 11.5, 7.9$  Hz, 2H), 7.44 – 7.27 (m, 6H), 6.84 (dt,  $J = 6.2, 2.3$  Hz, 1H), 6.80 – 6.68 (m, 2H), 3.80 (d,  $J = 1.9$  Hz, 3H), 3.26 (s, 3H), 3.08 (dd,  $J = 15.2, 10.0$  Hz, 1H), 2.83 (dd,  $J = 15.2, 11.4$  Hz, 1H), 1.40 (s, 3H).  $^{13}\text{C}$  NMR (101 MHz,  $\text{CDCl}_3$ )  $\delta$  179.4 (d,  $J = 4.2$  Hz), 144.9, 133.7 (d,  $J = 99.1$  Hz), 132.6 (d,  $J = 78.1$  Hz), 132.6 (d,  $J = 75.3$  Hz), 131.2 (d,  $J = 2.7$  Hz), 131.1 (d,  $J = 2.7$  Hz), 130.6 (d,  $J = 9.6$  Hz), 130.4 (d,  $J = 9.1$  Hz), 128.2 (d,  $J = 11.7$  Hz), 127.9 (d,  $J = 11.8$  Hz), 122.5, 117.5, 111.8, 55.8, 45.4 (d,  $J = 3.8$  Hz), 37.6 (d,  $J = 71.2$  Hz), 29.5, 26.9 (d,  $J = 12.0$  Hz).  $^{31}\text{P}$  NMR (162 MHz,  $\text{CDCl}_3$ )  $\delta$  25.89. MS (ESI,  $m/z$ ): calculated for  $\text{C}_{24}\text{H}_{24}\text{NO}_3\text{P}$   $[\text{M}+\text{H}]^+$ : 406.1567, found: 406.3. Spectral data for this compound is consistent with that previously reported. <sup>[S1b]</sup>

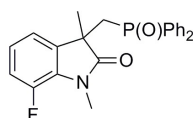

**3-((diphenylphosphoryl)methyl)-7-fluoro-1,3-dimethylindolin-2-one (3ap)** Light yellow solid;  $^1\text{H}$  NMR (400 MHz,  $\text{CDCl}_3$ )  $\delta$  7.62 – 7.53 (m, 2H), 7.53 – 7.38 (m, 4H), 7.38 – 7.27 (m, 4H), 6.91 (d,  $J = 7.4$  Hz, 1H), 6.86 (dd,  $J = 11.5, 8.4$  Hz, 1H), 6.68 (m, 1H), 3.18 (d,  $J = 2.6$  Hz, 3H), 3.09 (dd,  $J = 15.2, 10.1$  Hz, 1H), 2.81 (dd,  $J = 15.2, 11.0$  Hz, 1H), 1.40 (d,  $J = 1.4$  Hz, 3H).  $^{13}\text{C}$  NMR (101 MHz,  $\text{CDCl}_3$ )  $\delta$  178.9 (d,  $J = 3.7$  Hz), 147.5 (d,  $J = 242.9$  Hz), 134.2 (d,  $J = 5.9$  Hz), 134.1 (d,  $J = 18.2$  Hz), 133.1 (d,  $J = 12.0$  Hz), 132.2, 131.4 (d,  $J = 2.7$  Hz), 131.3 (d,  $J = 2.7$  Hz), 130.7 (d,  $J = 9.5$  Hz), 130.4 (d,  $J = 9.2$  Hz), 129.6 (d,  $J = 8.2$  Hz), 128.3 (d,  $J = 11.7$  Hz), 128.1 (d,  $J = 11.8$  Hz), 122.5 (d,  $J = 6.3$  Hz), 120.6 (d,  $J = 3.2$  Hz), 115.7 (d,  $J = 19.1$  Hz), 45.6 (dd,  $J = 3.7, 2.2$  Hz), 37.7 (d,  $J = 71.0$  Hz), 28.7 (d,  $J = 5.9$  Hz), 27.1 (d,  $J = 12.1$  Hz).  $^{31}\text{P}$  NMR (162 MHz,  $\text{CDCl}_3$ )  $\delta$  25.58.  $^{19}\text{F}$  NMR (376 MHz,  $\text{CDCl}_3$ )  $\delta$  -137.29. MS (ESI,  $m/z$ ): calculated for  $\text{C}_{23}\text{H}_{21}\text{FNO}_2\text{P}$   $[\text{M}+\text{H}]^+$ : 394.1367, found: 394.4. Spectral data for this compound is consistent with that previously reported. <sup>[S1b]</sup>

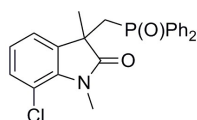

**7-chloro-3-((diphenylphosphoryl)methyl)-1,3-dimethylindolin-2-one (3aq)** Light yellow solid;  $^1\text{H}$  NMR (400 MHz,  $\text{CDCl}_3$ )  $\delta$  7.59 (dd,  $J = 11.3, 7.4$  Hz, 2H), 7.47 – 7.39 (m, 4H), 7.33 (m, 4H), 7.06 (d,  $J = 7.8$  Hz, 2H), 6.69 (m, 1H), 3.31 (s, 3H), 3.10 (dd,  $J = 15.2, 9.7$  Hz, 1H), 2.80 (dd,  $J = 15.2, 11.6$  Hz, 1H), 1.39 (d,  $J = 1.6$  Hz, 3H).  $^{13}\text{C}$  NMR (101 MHz,  $\text{CDCl}_3$ )  $\delta$  179.6 (d,  $J = 3.4$  Hz), 138.8, 134.0 (d,  $J = 2.8$  Hz), 133.5 (d,  $J = 99.5$  Hz), 132.3 (d,  $J = 98.7$  Hz), 131.5 (d,  $J = 2.7$  Hz), 131.3 (d,  $J = 2.7$  Hz), 130.7 (d,  $J = 9.5$  Hz), 130.4 (d,  $J = 9.1$  Hz), 130.2, 128.4 (d,  $J = 11.7$  Hz), 128.1 (d,  $J = 11.8$  Hz), 123.3, 122.8, 115.1, 45.1 (d,  $J = 3.8$  Hz), 37.7 (d,  $J = 70.8$  Hz), 29.6, 27.3 (d,  $J = 12.1$  Hz).  $^{31}\text{P}$  NMR (162 MHz,  $\text{CDCl}_3$ )  $\delta$  25.65. MS (ESI,  $m/z$ ): calculated for  $\text{C}_{23}\text{H}_{21}\text{ClNO}_2\text{P}$   $[\text{M}+\text{H}]^+$ : 410.1071, found: 410.2. Spectral data for this compound is consistent with that previously reported. <sup>[S1b]</sup>

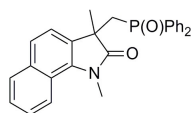

**3-((diphenylphosphoryl)methyl)-1,3-dimethyl-1H-benzo[g]indol-2(3H)-one (3ar)** Gray solid;  $^1\text{H}$  NMR (400 MHz,  $\text{CDCl}_3$ )  $\delta$  7.55 (d,  $J = 8.1$  Hz, 1H), 7.50 – 7.40 (m, 3H), 7.33 (m, 5H), 7.27 – 7.17 (m, 4H), 7.09 (td,  $J = 7.6, 2.7$  Hz, 2H), 6.79 (d,  $J = 7.4$  Hz, 1H), 3.83 (dd,  $J = 15.0, 9.9$  Hz, 1H), 3.34 (s, 3H), 2.99 (dd,  $J = 15.0, 11.1$  Hz, 1H), 1.74 (d,  $J = 2.2$  Hz, 3H).  $^{13}\text{C}$  NMR (101 MHz,  $\text{CDCl}_3$ )  $\delta$  172.2 (d,  $J = 2.2$  Hz), 136.5, 135.3 (d,  $J = 2.4$  Hz), 133.7 (d,  $J = 58.2$  Hz), 133.0, 132.7 (d,  $J = 57.5$  Hz), 131.0 (d,  $J = 2.6$  Hz), 130.9 (d,  $J = 3.5$  Hz), 130.8, 130.5 (d,  $J = 9.2$  Hz), 128.0 (d,  $J = 11.8$  Hz), 127.6 (d,  $J = 11.7$  Hz), 126.3 (d,  $J = 4.2$  Hz), 126.1, 124.1, 122.2, 119.1, 108.4, 45.2 (d,  $J = 3.5$  Hz), 42.3 (d,  $J = 69.8$  Hz), 34.8 (d,  $J = 13.6$  Hz), 29.8.  $^{31}\text{P}$  NMR (162 MHz,  $\text{CDCl}_3$ )  $\delta$  27.30. MS (ESI,  $m/z$ ): calculated for  $\text{C}_{27}\text{H}_{24}\text{NO}_2\text{P}$   $[\text{M}+\text{H}]^+$ : 426.1617, found: 426.4. Spectral data for this compound is consistent with that previously reported. <sup>[S1c]</sup>

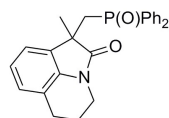

**1-((diphenylphosphoryl)methyl)-1-methyl-5,6-dihydro-1H-pyrrolo[3,2,1-ij]quinolin-2(4H)-one (3as)** Light yellow oil;  $^1\text{H}$  NMR (400 MHz,  $\text{CDCl}_3$ )  $\delta$  7.65 – 7.54 (m, 2H), 7.54 – 7.45 (m, 2H), 7.45 – 7.27 (m, 6H), 7.02 (d,  $J = 7.4$  Hz, 1H), 6.89 (d,  $J = 7.7$  Hz, 1H), 6.69 (t,  $J = 7.6$  Hz, 1H), 3.68 – 3.52 (m, 1H), 3.34 (m, 1H), 3.07 (dd,  $J = 15.2, 10.1$  Hz, 1H), 2.85 (dd,  $J = 15.2, 11.1$  Hz, 1H), 2.65 (t,  $J = 7.4$  Hz, 2H), 1.97 – 1.77 (m, 2H), 1.42 (d,  $J = 1.4$  Hz, 3H).  $^{13}\text{C}$  NMR (101 MHz,  $\text{CDCl}_3$ )  $\delta$  178.2 (d,  $J = 4.6$  Hz), 138.6, 133.9 (d,  $J = 71.6$  Hz), 132.9 (d,  $J = 70.9$  Hz), 131.3 (d,  $J = 2.8$  Hz), 131.2 (d,  $J = 2.6$  Hz), 130.7 (d,  $J = 9.5$  Hz), 130.5 (d,  $J = 9.1$  Hz), 130.0 (d,  $J = 2.9$  Hz), 128.3 (d,  $J = 11.7$  Hz), 128.1 (d,  $J = 11.8$  Hz), 126.6, 122.7, 121.6, 119.7, 46.6 (d,  $J = 3.8$  Hz), 38.8, 37.4 (d,  $J = 71.5$  Hz), 26.6 (d,  $J = 11.8$  Hz), 24.4, 20.8.  $^{31}\text{P}$  NMR (162 MHz,  $\text{CDCl}_3$ )  $\delta$  26.11. MS (ESI,  $m/z$ ): calculated for  $\text{C}_{25}\text{H}_{24}\text{NO}_2\text{P}$   $[\text{M}+\text{H}]^+$ : 402.1617, found: 402.4. Spectral data for this compound is consistent with that previously reported. <sup>[S1c]</sup>

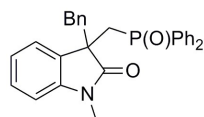

**3-benzyl-3-((diphenylphosphoryl)methyl)-1-methylindolin-2-one (3at)** Light yellow solid;  $^1\text{H}$  NMR (400 MHz,  $\text{CDCl}_3$ )  $\delta$  7.64 – 7.57 (m, 2H), 7.49 – 7.39 (m, 3H), 7.39 – 7.32 (m, 3H), 7.27 (m, 2H), 7.13 (d,  $J = 7.4$  Hz, 1H), 7.10 – 7.04 (m, 1H), 7.04 – 6.92 (m, 3H), 6.78 (td,  $J = 7.6, 0.7$  Hz, 1H), 6.76 – 6.66 (m, 2H), 6.36 (d,  $J = 7.8$  Hz, 1H), 3.28 – 2.93 (m, 4H), 2.68 (s, 3H).  $^{13}\text{C}$  NMR (101 MHz,  $\text{CDCl}_3$ )  $\delta$  177.8 (d,  $J = 3.7$  Hz), 143.4, 134.5 (d,  $J = 1.5$  Hz), 133.8 (d,  $J = 99.4$  Hz), 132.8 (d,  $J = 98.6$  Hz), 131.2

(d,  $J = 2.7$  Hz), 130.8 (d,  $J = 9.5$  Hz), 130.5 (d,  $J = 9.1$  Hz), 129.9, 128.4 (d,  $J = 4.6$  Hz), 128.1 (d,  $J = 25.7$  Hz), 127.9 (d,  $J = 4.4$  Hz), 127.2, 126.5, 125.8, 121.6, 107.4, 50.9 (d,  $J = 3.7$  Hz), 46.2 (d,  $J = 12.2$  Hz), 36.5 (d,  $J = 71.2$  Hz), 25.8.  $^{31}\text{P}$  NMR (162 MHz,  $\text{CDCl}_3$ )  $\delta$  25.94. MS (ESI,  $m/z$ ): calculated for  $\text{C}_{29}\text{H}_{26}\text{NO}_2\text{P}$   $[\text{M}+\text{H}]^+$ : 452.1774, found: 452.3. Spectral data for this compound is consistent with that previously reported.<sup>[S1a]</sup>

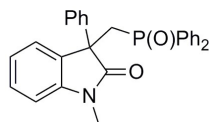

**3-((diphenylphosphoryl)methyl)-1-methyl-3-phenylindolin-2-one (3au)** Light yellow solid;  $^1\text{H}$  NMR (400 MHz,  $\text{CDCl}_3$ )  $\delta$  7.58 – 7.52 (m, 2H), 7.51 – 7.45 (m, 2H), 7.42 – 7.27 (m, 8H), 7.26 – 7.13 (m, 4H), 7.04 (d,  $J = 7.4$  Hz, 1H), 6.81 – 6.65 (m, 2H), 3.71 (dd,  $J = 14.9, 10.9$  Hz, 1H), 3.24 (dd,  $J = 14.9, 10.1$  Hz, 1H), 3.02 (s, 3H).  $^{13}\text{C}$  NMR (101 MHz,  $\text{CDCl}_3$ )  $\delta$  177.5 (d,  $J = 2.2$  Hz), 144.2, 140.6 (d,  $J = 12.3$  Hz), 133.8 (d,  $J = 31.2$  Hz), 132.9 (d,  $J = 30.1$  Hz), 131.3 (d,  $J = 2.7$  Hz), 131.0 (d,  $J = 2.7$  Hz), 130.7 (d,  $J = 9.4$  Hz), 130.4 (d,  $J = 9.1$  Hz), 129.0 (d,  $J = 3.2$  Hz), 128.5, 128.3 (d,  $J = 7.9$  Hz), 128.2, 128.1 (d,  $J = 6.7$  Hz), 127.1 (d,  $J = 54.9$  Hz), 126.4, 121.8, 108.1, 52.6 (d,  $J = 3.0$  Hz), 38.5 (d,  $J = 70.1$  Hz), 26.6.  $^{31}\text{P}$  NMR (162 MHz,  $\text{CDCl}_3$ )  $\delta$  24.91. MS (ESI,  $m/z$ ): calculated for  $\text{C}_{28}\text{H}_{24}\text{NO}_2\text{P}$   $[\text{M}+\text{H}]^+$ : 438.1617, found: 438.5. Spectral data for this compound is consistent with that previously reported.<sup>[S1a]</sup>

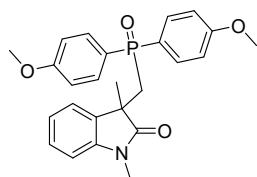

**3-((bis(4-methoxyphenyl)phosphoryl)methyl)-1,3-dimethylindolin-2-one (3av)** White solid;  $^1\text{H}$  NMR (400 MHz,  $\text{CDCl}_3$ )  $\delta$  7.54 – 7.44 (m, 2H), 7.41 – 7.30 (m, 2H), 7.26 – 7.15 (m, 2H), 6.84 (dd,  $J = 25.2, 7.3$  Hz, 5H), 6.67 (d,  $J = 7.6$  Hz, 1H), 3.82 (s, 3H), 3.79 (s, 3H), 3.16 – 2.91 (m, 4H), 2.86 – 2.72 (m, 1H), 1.41 (s, 3H).  $^{13}\text{C}$  NMR (101 MHz,  $\text{CDCl}_3$ )  $\delta$  179.5, 161.8 (d,  $J = 2.9$  Hz), 142.8, 132.6 (d,  $J = 10.9$  Hz), 132.3 (d,  $J = 10.5$  Hz), 131.6, 127.8, 124.8, 122.1, 113.9 (d,  $J = 12.7$  Hz), 113.6 (d,  $J = 12.8$  Hz), 107.7, 55.2, 45.5 (d,  $J = 3.7$  Hz), 37.6 (d,  $J = 72.0$  Hz), 27.0 (d,  $J = 12.3$  Hz), 26.3.  $^{31}\text{P}$  NMR (162 MHz,  $\text{CDCl}_3$ )  $\delta$  26.42. MS (ESI,  $m/z$ ): calculated for  $\text{C}_{25}\text{H}_{26}\text{NO}_4\text{P}$   $[\text{M}+\text{H}]^+$ : 436.1672, found: 436.3. Spectral data for this compound is consistent with that previously reported.<sup>[S1i]</sup>

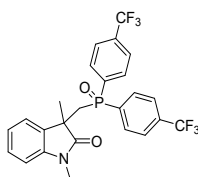

**3-((bis(4-(trifluoromethyl)phenyl)phosphoryl)methyl)-1,3-dimethylindolin-2-one (3aw)** White solid; M.p. = 181–183 °C,  $^1\text{H}$  NMR (400 MHz,  $\text{CDCl}_3$ )  $\delta$  7.65 (dd,  $J = 21.2, 9.8$  Hz, 8H), 7.18 (t,  $J = 7.6$  Hz, 1H), 7.02 (d,  $J = 7.3$  Hz, 1H), 6.74 (t,  $J = 7.5$  Hz, 1H), 6.68 (d,  $J = 7.8$  Hz, 1H), 3.21 (dd,  $J = 15.1, 10.4$  Hz, 1H), 3.03 (s, 3H), 2.90 (dd,  $J = 15.1, 10.8$  Hz, 1H), 1.46 (s, 3H);  $^{13}\text{C}$  NMR (101 MHz,  $\text{CDCl}_3$ )  $\delta$  178.9 (d,  $J = 3.1$  Hz), 142.9, 137.2 (d,  $J = 96.8$  Hz), 136.8, 135.9, 133.6 (d,  $J = 18.2$  Hz), 133.5 (d,  $J = 18.4$  Hz), 133.3 (d,  $J = 18.4$  Hz), 133.2 (d,  $J = 18.3$  Hz), 131.2 (d,  $J = 9.7$  Hz), 130.8 (d,  $J = 9.6$  Hz), 130.6 (d,  $J = 2.9$  Hz), 128.3, 125.4 (d,  $J = 11.9$  Hz), 125.3 (d,  $J = 11.9$  Hz), 125.2 (d,  $J = 24.6$  Hz), 125.1 (d,  $J = 11.9$  Hz), 125.1 (d,  $J = 11.9$  Hz), 124.7 (d,  $J = 5.4$  Hz), 124.4, 122.1, 122.0 (d,  $J$

= 6.1 Hz), 108.0, 45.2 (d,  $J$  = 3.8 Hz), 37.5 (d,  $J$  = 72.2 Hz), 27.1 (d,  $J$  = 13.1 Hz), 26.3;  $^{31}\text{P}$  NMR (162 MHz,  $\text{CDCl}_3$ )  $\delta$  24.16,  $^{19}\text{F}$  NMR (376 MHz,  $\text{CDCl}_3$ )  $\delta$  -63.26, -63.31. HRMS (ESI,  $m/z$ ): calculated for  $\text{C}_{25}\text{H}_{20}\text{F}_6\text{NO}_2\text{P}$  ( $\text{M}+\text{Na}$ ) $^+$ , 534.1028; found, 534.1030.

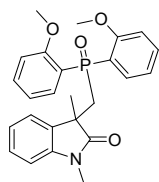

**3-((bis(2-methoxyphenyl)phosphoryl)methyl)-1,3-dimethylindolin-2-one (3ax)** White solid; M.p. = 151-152 °C,  $^1\text{H}$  NMR (400 MHz,  $\text{CDCl}_3$ )  $\delta$  7.42 – 7.29 (m, 3H), 7.23 (dd,  $J$  = 14.1, 6.9 Hz, 2H), 7.09 (t,  $J$  = 7.6 Hz, 1H), 6.90 – 6.77 (m, 4H), 6.73 – 6.61 (m, 2H), 3.76 (s, 3H), 3.66 (s, 3H), 3.30 – 3.14 (m, 2H), 3.08 (s, 3H), 1.44 (s, 3H),  $^{13}\text{C}$  NMR (101 MHz,  $\text{CDCl}_3$ )  $\delta$  179.9 (d,  $J$  = 6.3 Hz), 160.2 (d,  $J$  = 91.0 Hz), 142.9, 133.7 (d,  $J$  = 6.7 Hz), 133.5 (d,  $J$  = 7.4 Hz), 133.1 (d,  $J$  = 2.0 Hz), 132.9 (d,  $J$  = 1.9 Hz), 132.3 (d,  $J$  = 2.9 Hz), 127.4, 124.9, 122.0 (d,  $J$  = 92.6 Hz), 121.0 (d,  $J$  = 93.0 Hz), 121.7, 120.5 (d,  $J$  = 60.0 Hz), 120.4 (d,  $J$  = 60.3 Hz), 110.6 (d,  $J$  = 3.8 Hz), 110.5 (d,  $J$  = 3.9 Hz), 107.4, 55.3 (d,  $J$  = 8.0 Hz), 45.7 (d,  $J$  = 4.1 Hz), 36.0 (d,  $J$  = 75.1 Hz), 26.3, 26.2 (d,  $J$  = 11.6 Hz),  $^{31}\text{P}$  NMR (162 MHz,  $\text{CDCl}_3$ )  $\delta$  26.62. HRMS (ESI,  $m/z$ ): calculated for  $\text{C}_{25}\text{H}_{26}\text{NO}_4\text{P}$  ( $\text{M}+\text{Na}$ ) $^+$ , 458.1492; found, 458.1493.

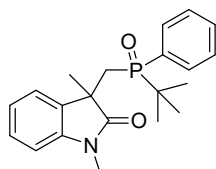

**3-((tert-butyl(phenyl)phosphoryl)methyl)-1,3-dimethylindolin-2-one (3ay)** Thick solid; M.p. = 184-185 °C,  $^1\text{H}$  NMR (400 MHz,  $\text{CDCl}_3$ )  $\delta$  7.41 (dd,  $J$  = 7.5, 0.7 Hz, 1H), 7.38 – 7.32 (m, 3H), 7.28 – 7.22 (m, 2H), 7.06 (td,  $J$  = 7.7, 1.2 Hz, 1H), 6.82 (td,  $J$  = 7.6, 0.9 Hz, 1H), 6.46 (d,  $J$  = 7.7 Hz, 1H), 2.85 (s, 3H), 2.66 – 2.58 (m, 2H), 1.54 (d,  $J$  = 0.6 Hz, 3H), 1.08 (d,  $J$  = 14.5 Hz, 9H).  $^{13}\text{C}$  NMR (101 MHz,  $\text{CDCl}_3$ )  $\delta$  179.8 (d,  $J$  = 6.1 Hz), 142.0, 131.8, 131.7, 131.1 (d,  $J$  = 3.2 Hz), 130.8 (d,  $J$  = 2.7 Hz), 129.3 (d,  $J$  = 86.9 Hz), 127.6, 127.4, 127.3, 126.0, 121.9, 107.2, 45.3 (d,  $J$  = 4.6 Hz), 33.3 (d,  $J$  = 69.7 Hz), 30.3 (d,  $J$  = 62.3 Hz), 26.4 (d,  $J$  = 7.8 Hz), 25.9, 24.1.  $^{31}\text{P}$  NMR (162 MHz,  $\text{CDCl}_3$ )  $\delta$  43.90. HRMS (ESI,  $m/z$ ): calculated for  $\text{C}_{21}\text{H}_{26}\text{NO}_2\text{P}$  ( $\text{M}+\text{Na}$ ) $^+$ , 378.1593; found, 378.1590.

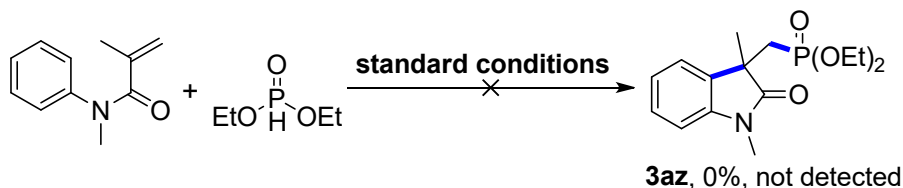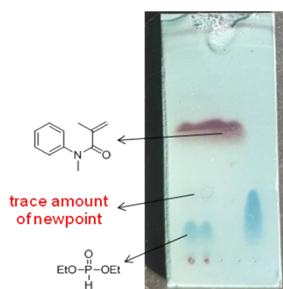

Diethyl phosphate instead of diphenylphosphine oxide under the optimal conditions, and the expected product **3az** was not detected. trace amount of newpoint can be observed which could not separated by

column chromatography. It may be that diethyl phosphite has stronger nucleophilicity and is difficult to form stable intermediate phosphorus radicals through a HAT process.

## 7. Copies of NMR spectra

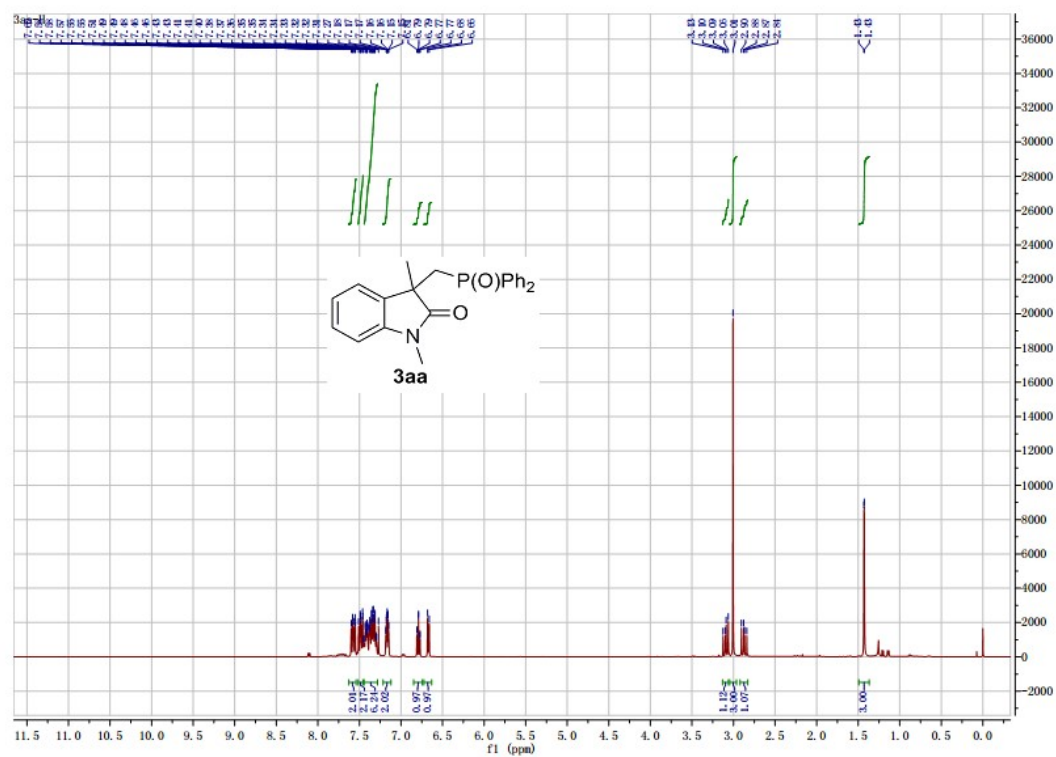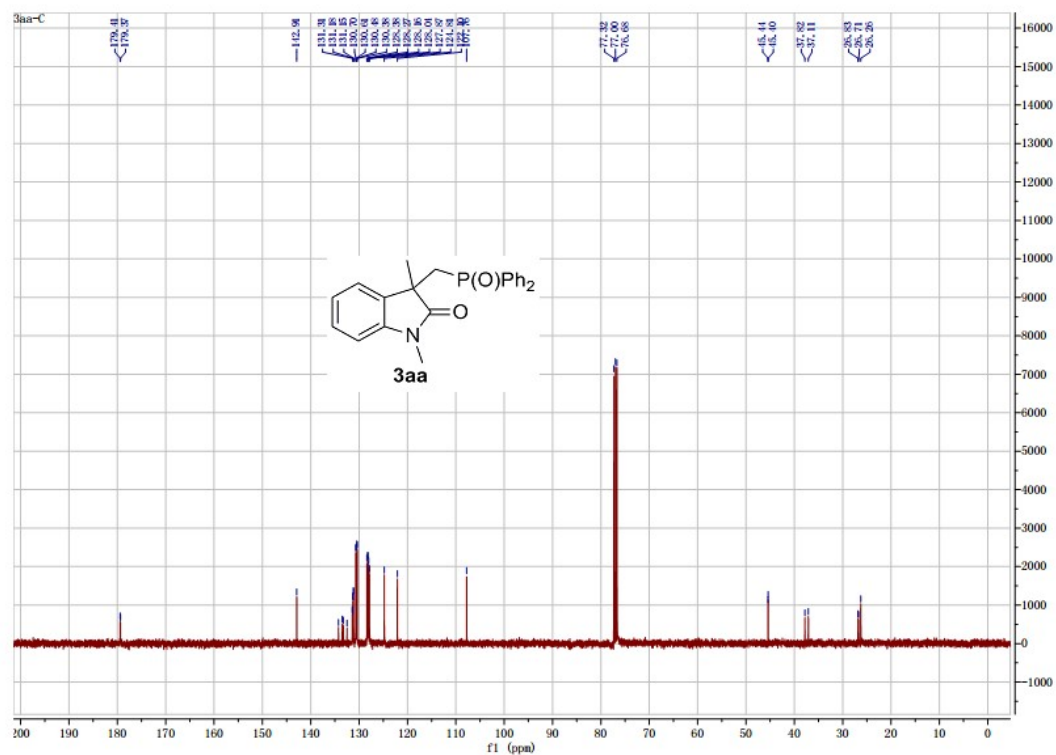

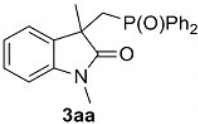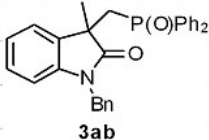





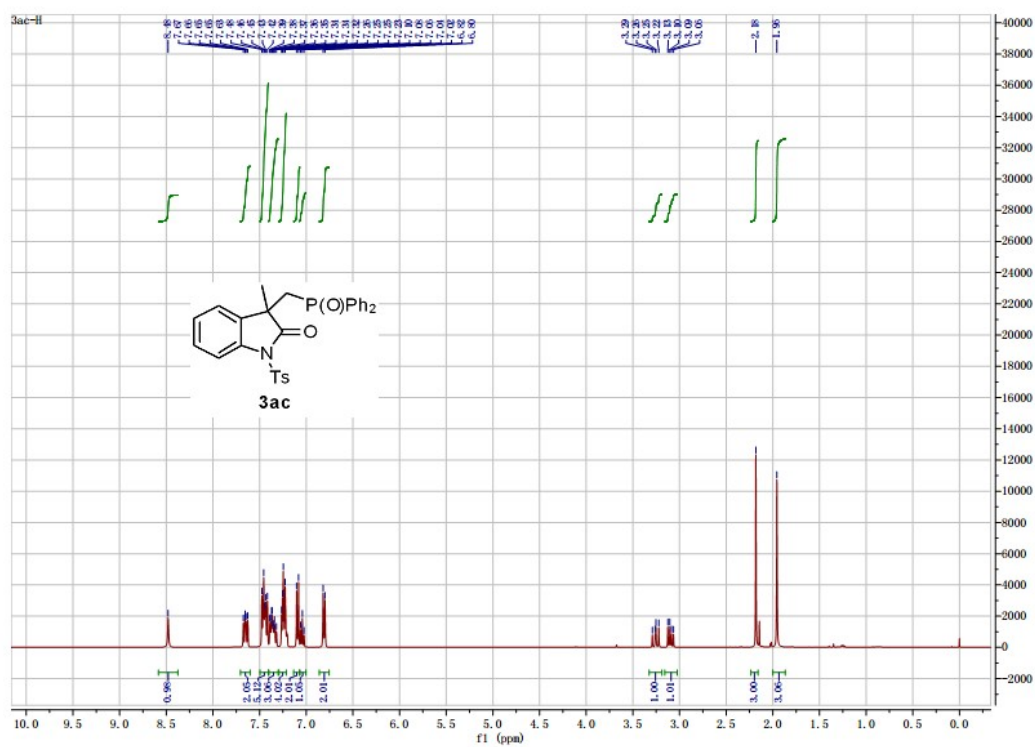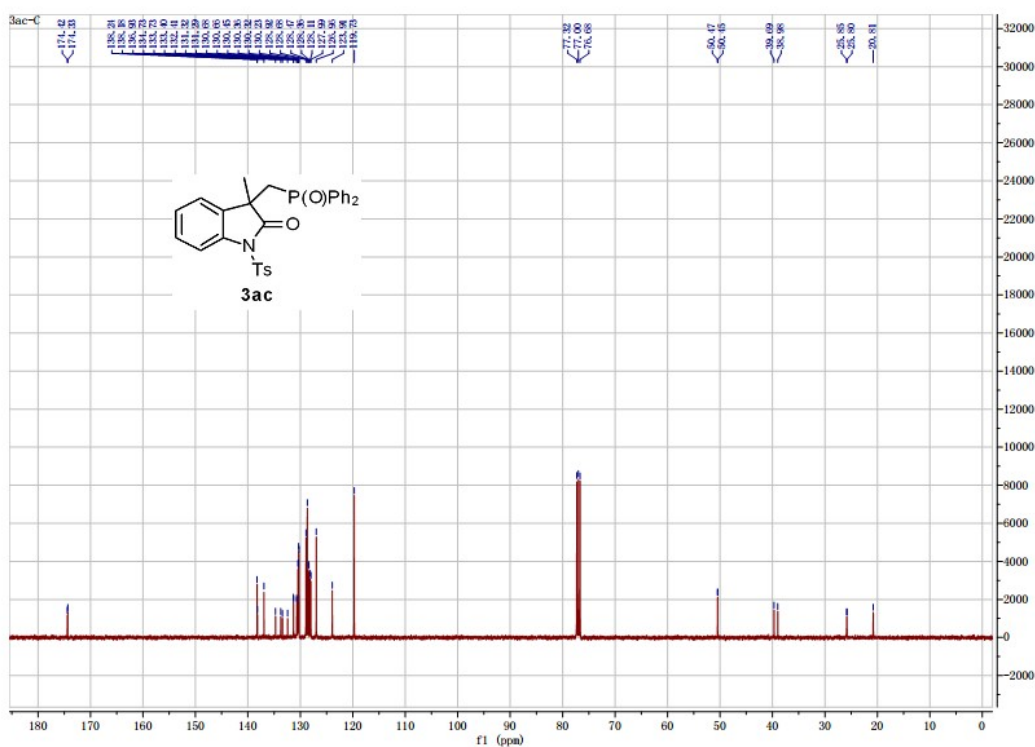

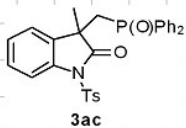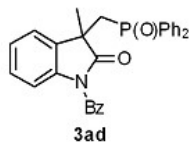



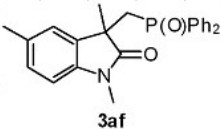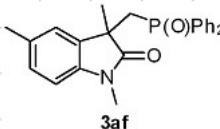

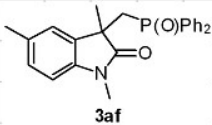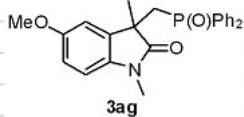



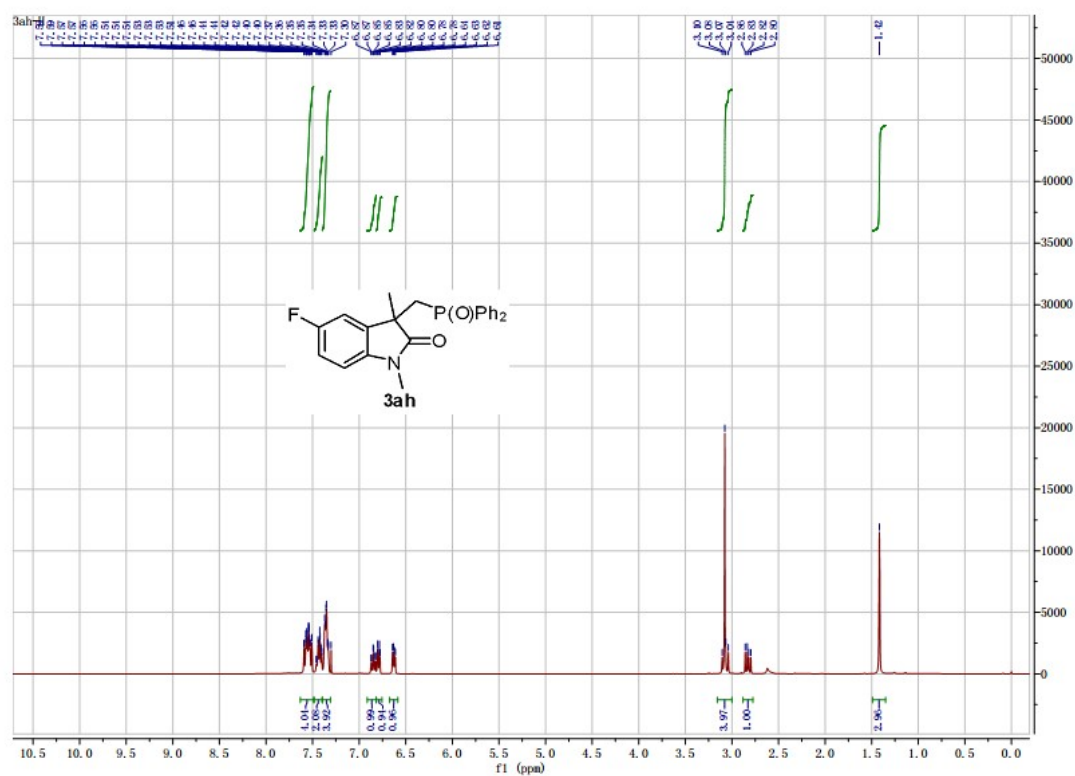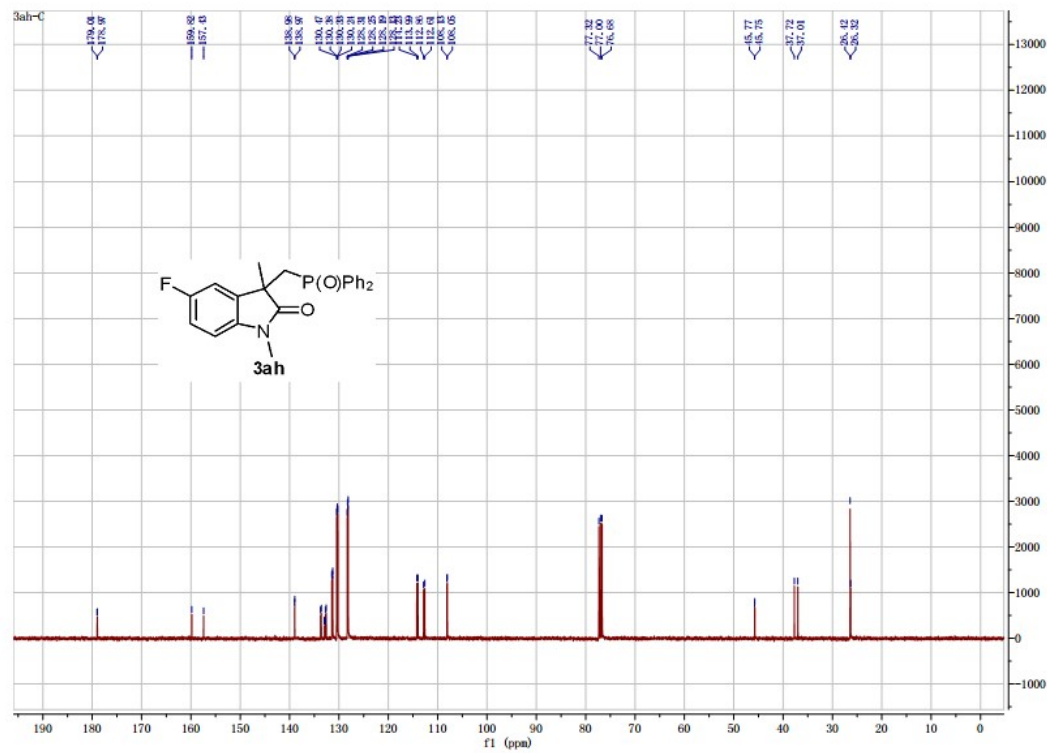



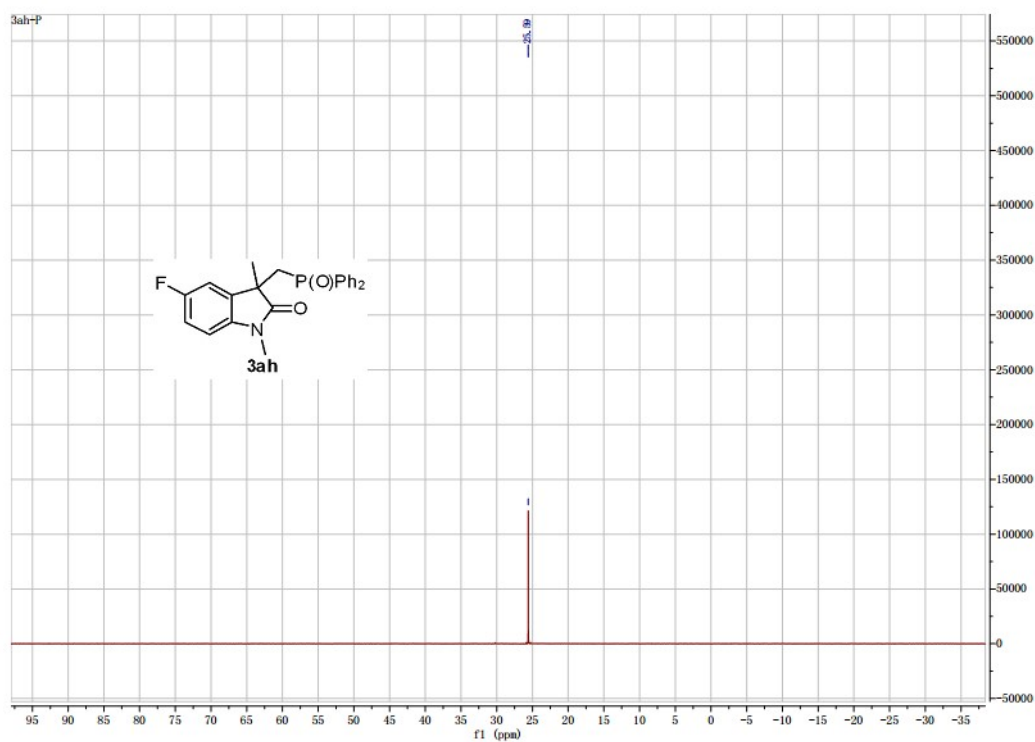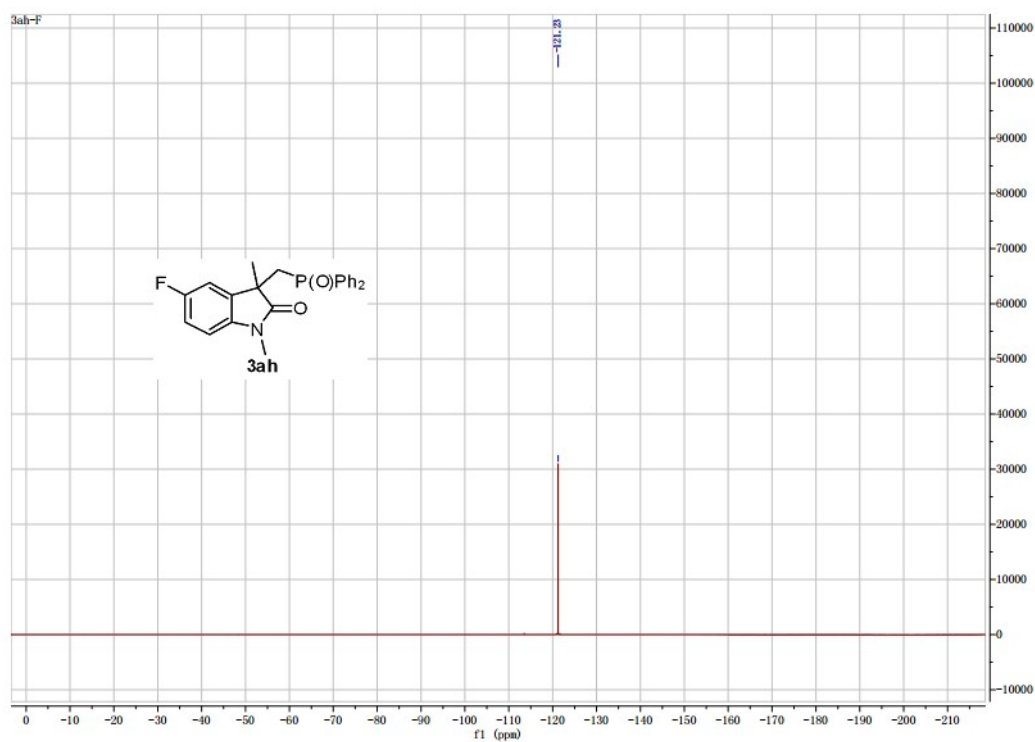

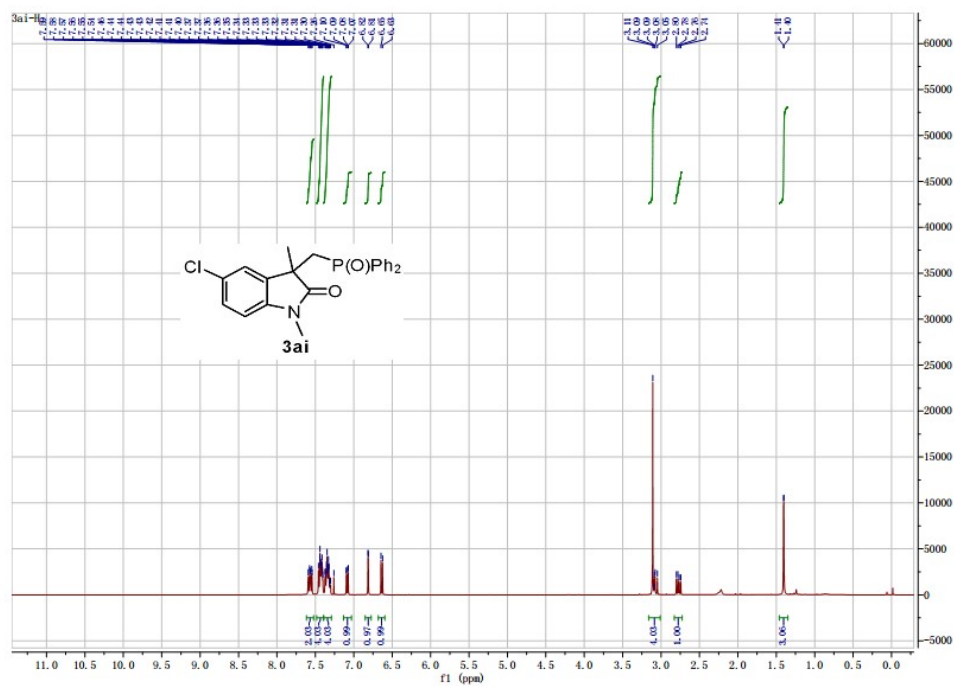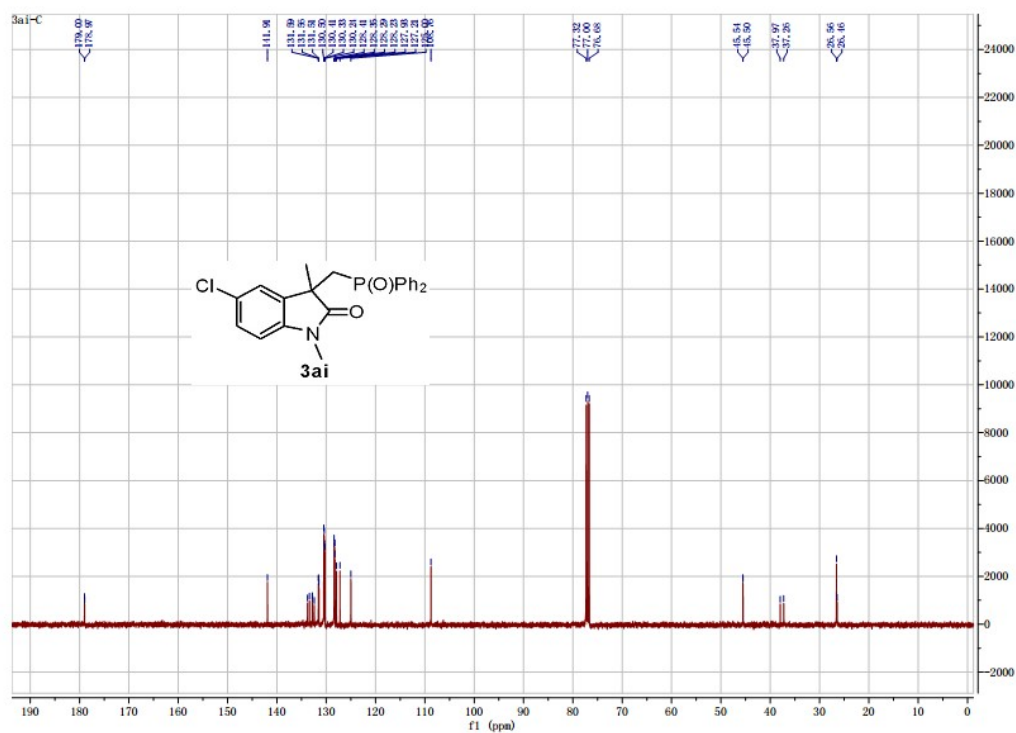

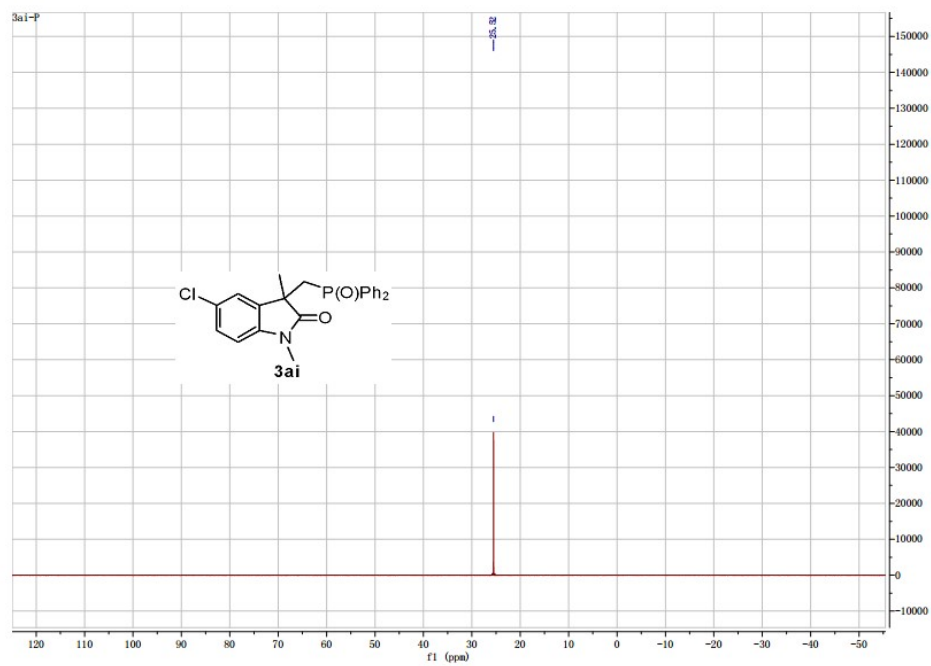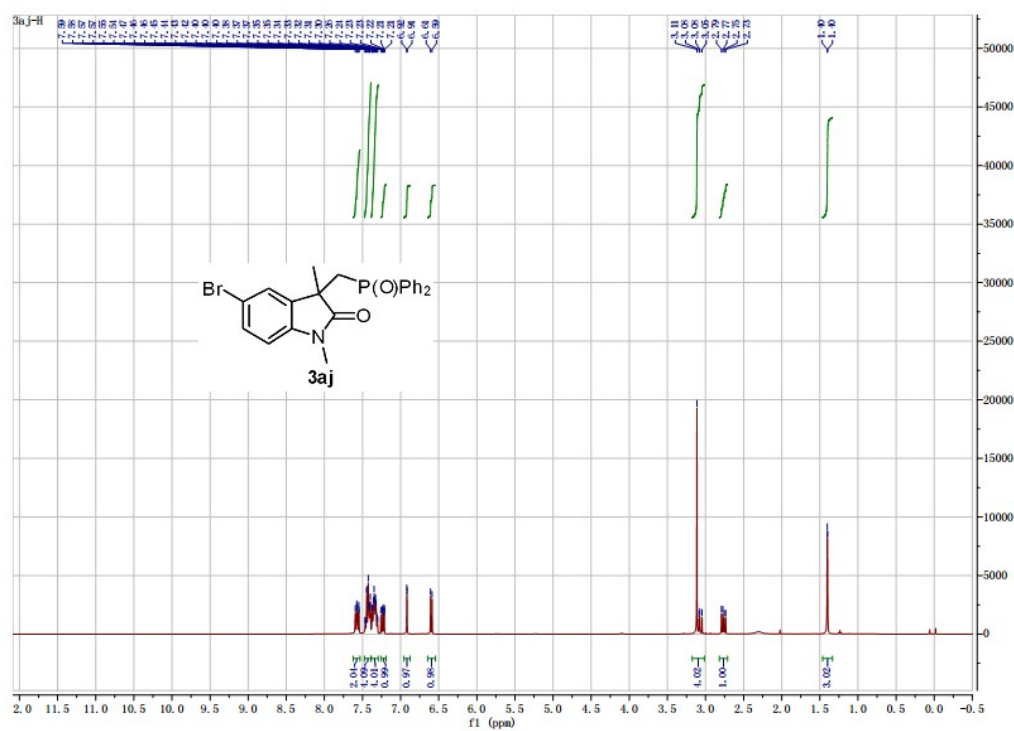

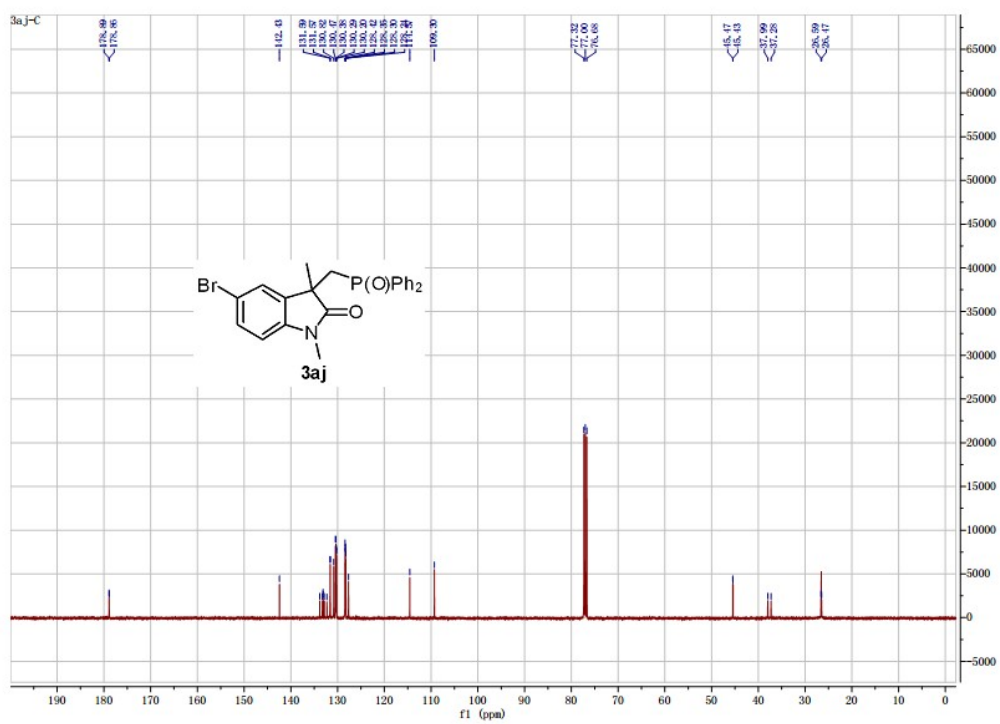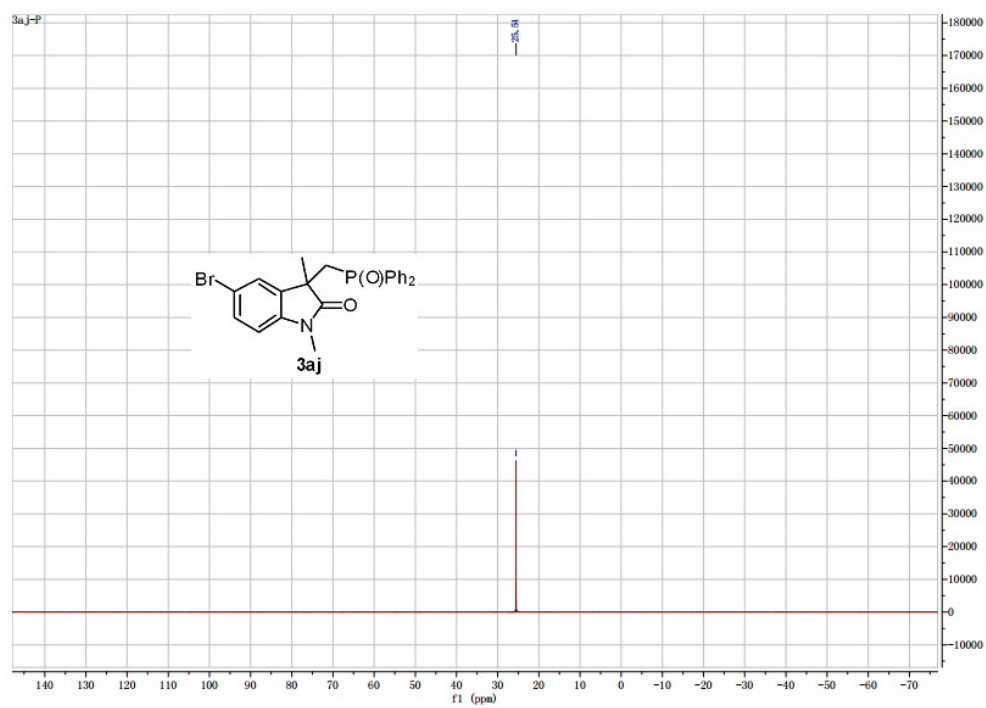



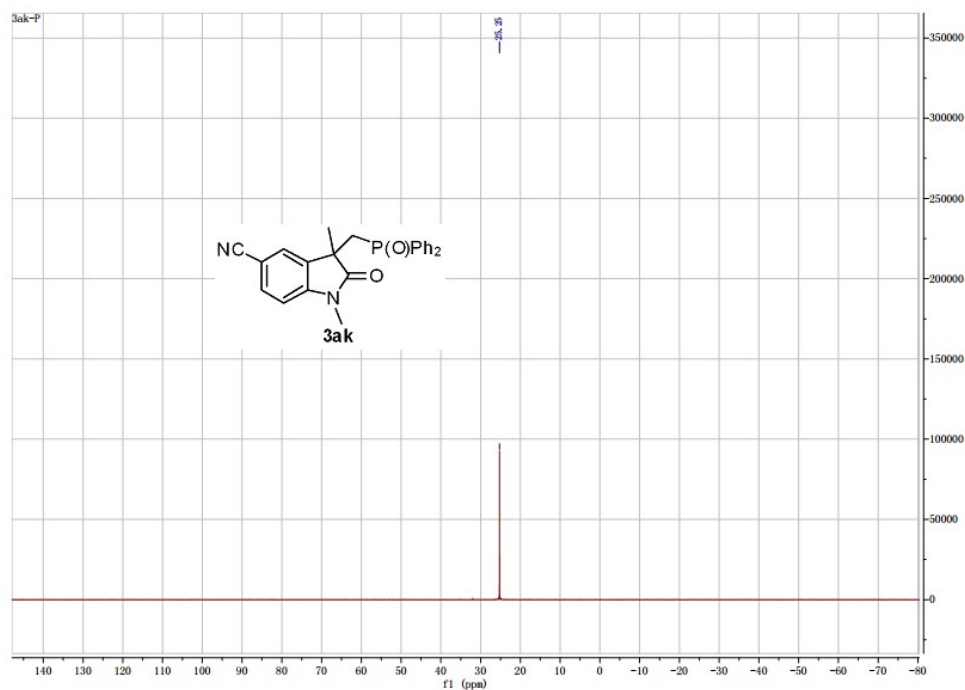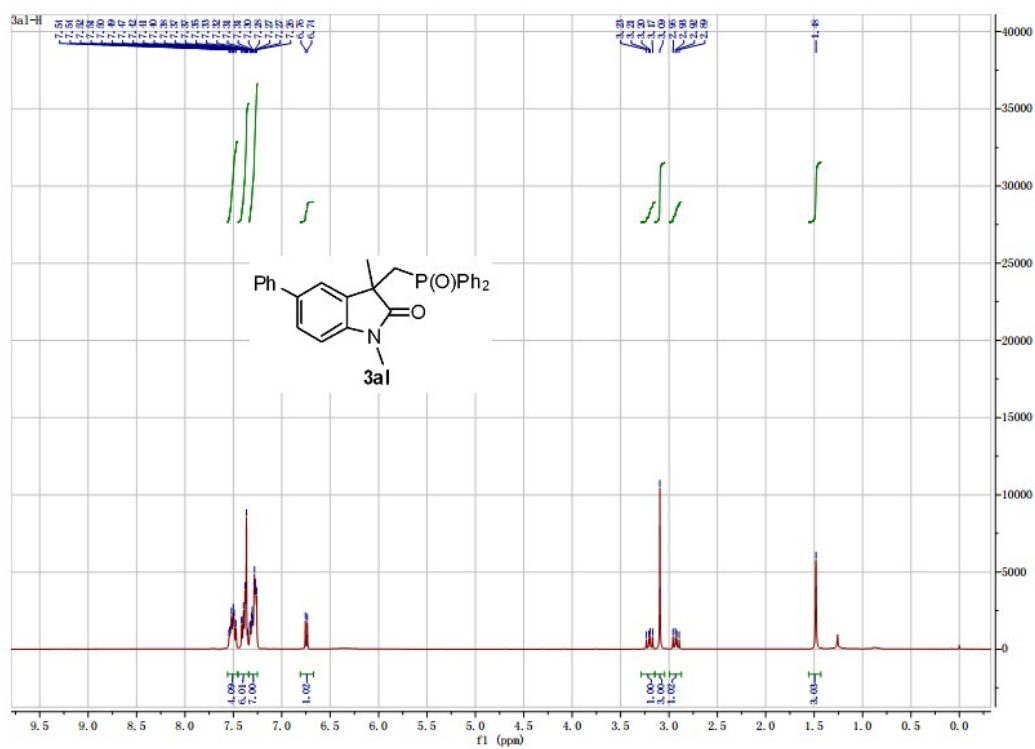

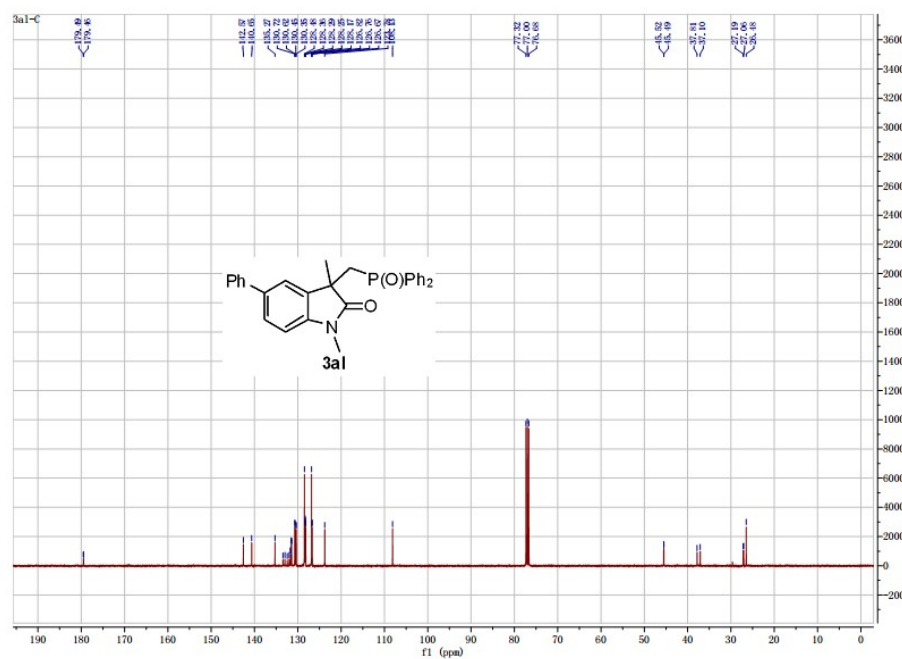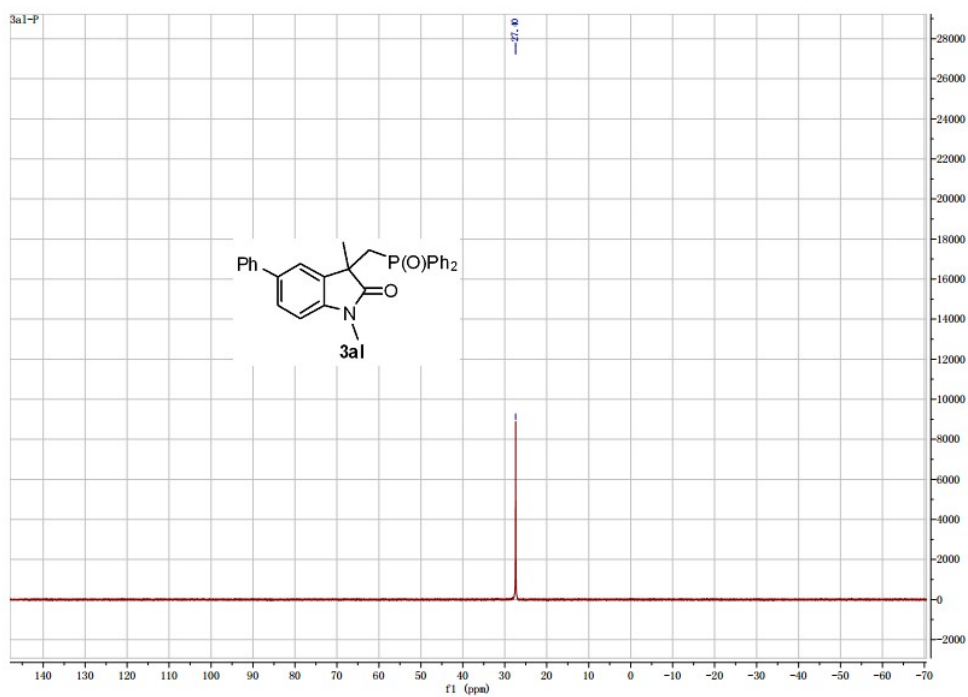



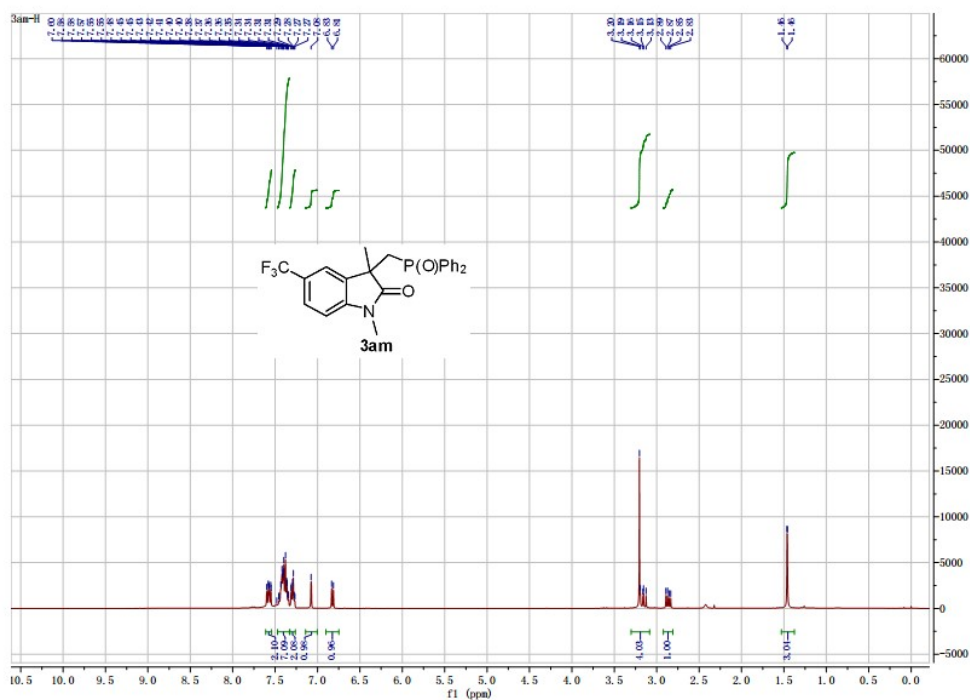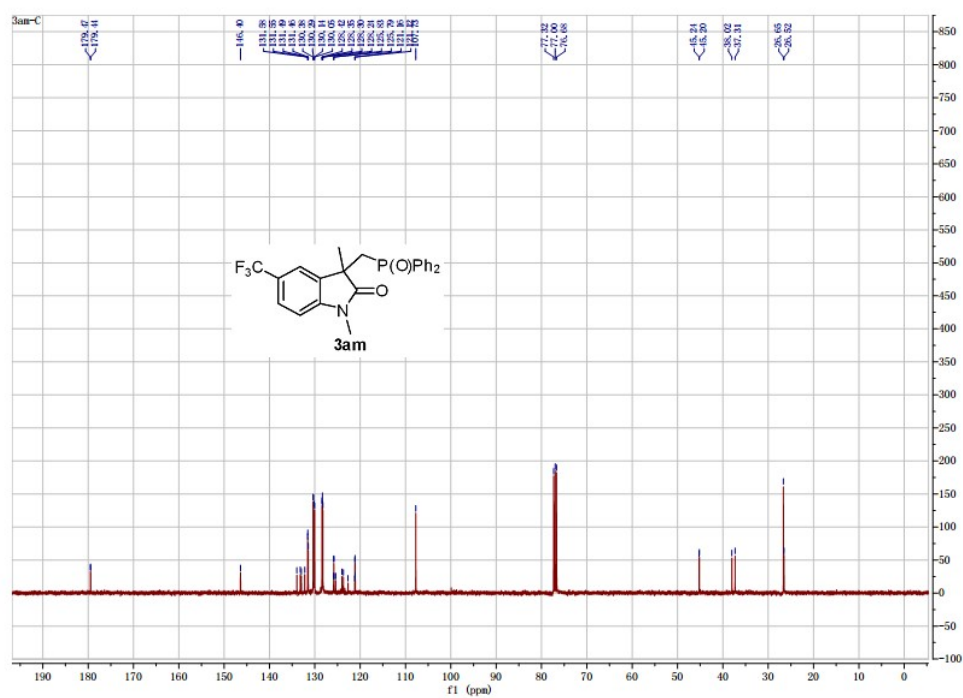

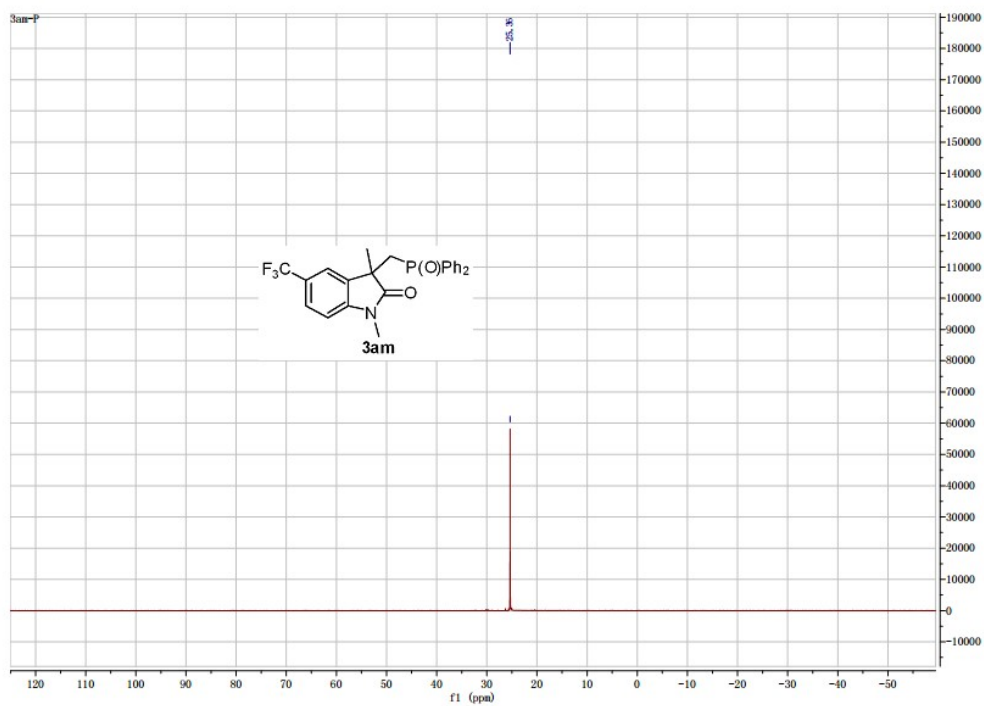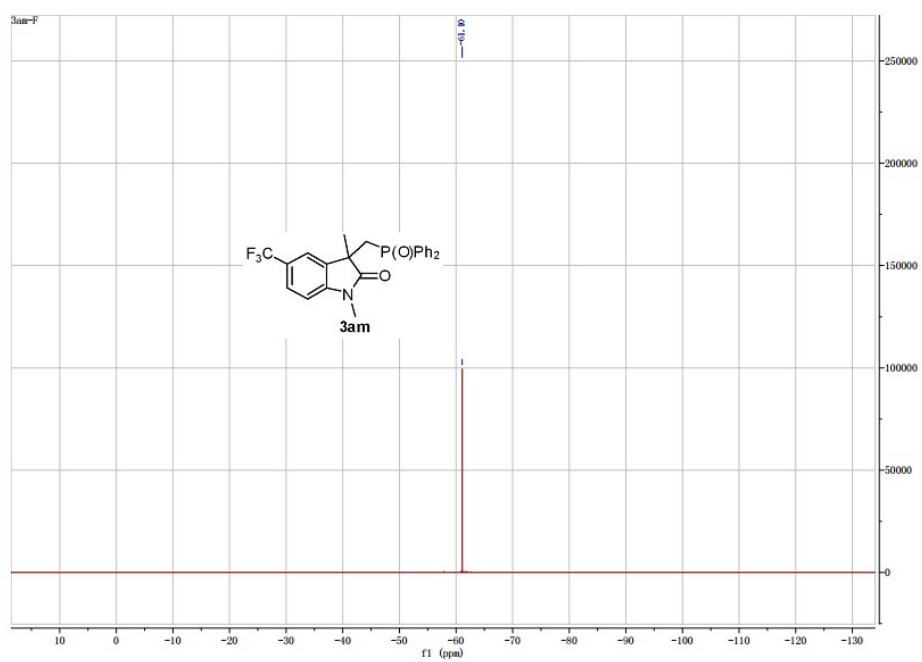

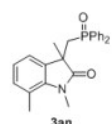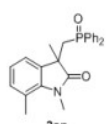

mao1120211216-n-1-P

8  
8

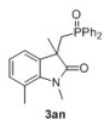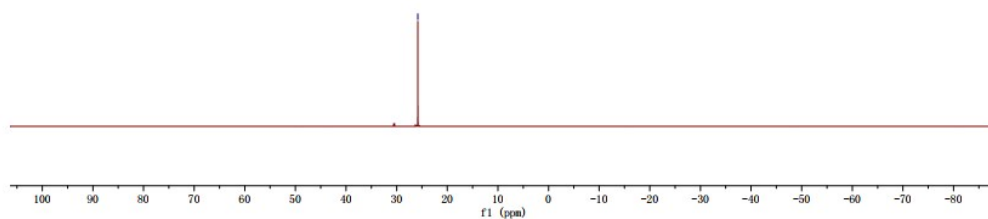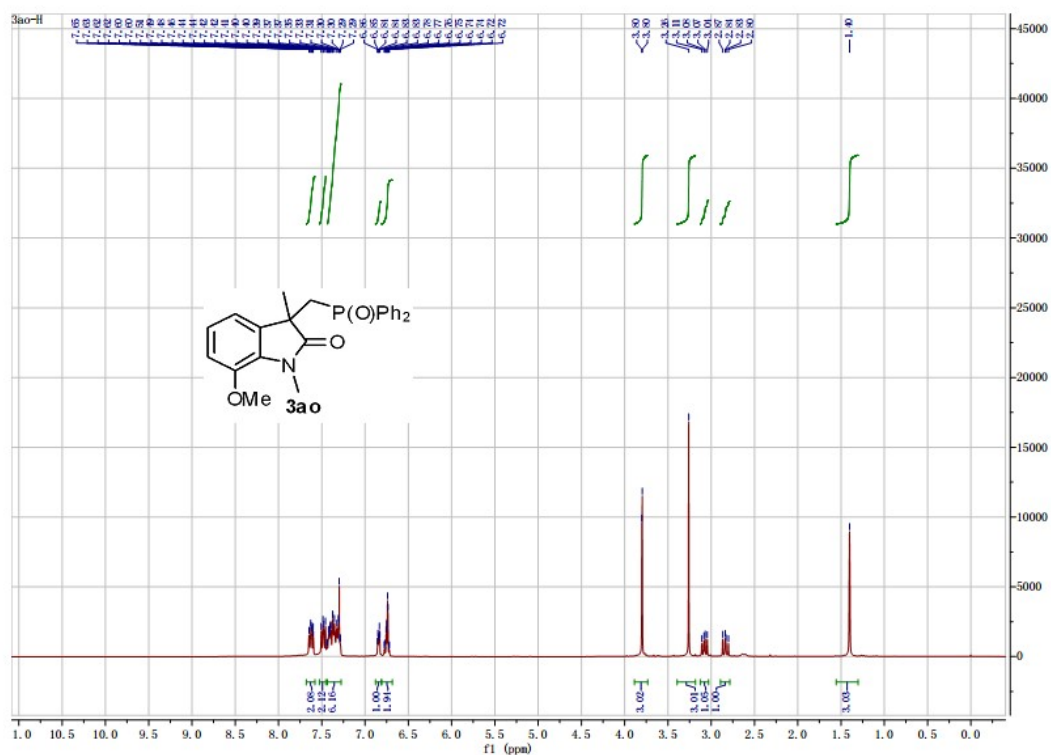

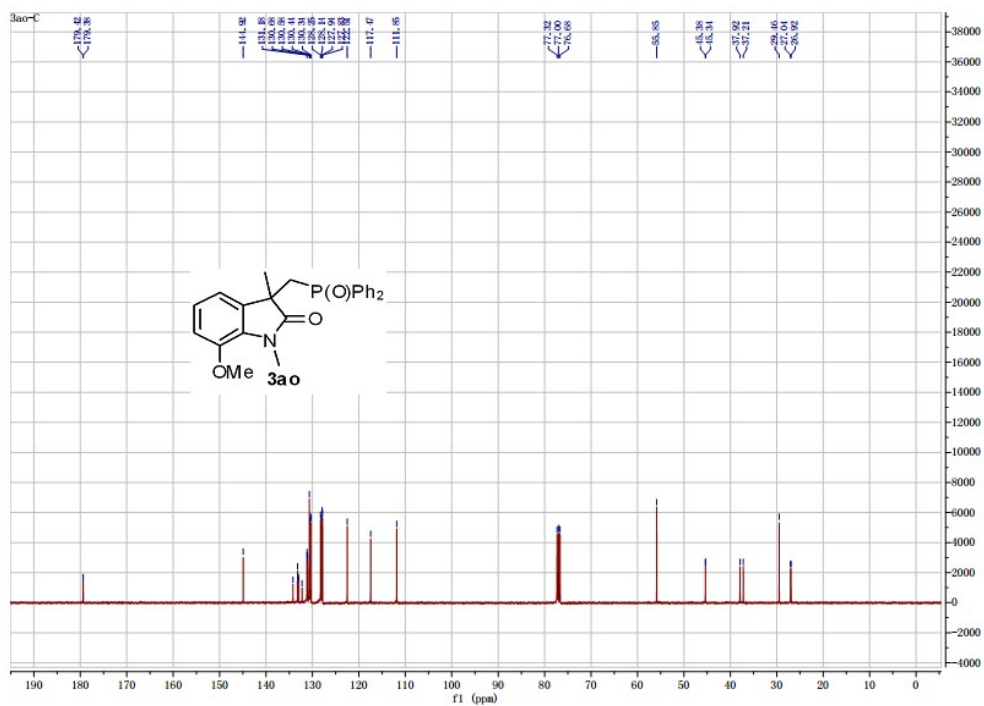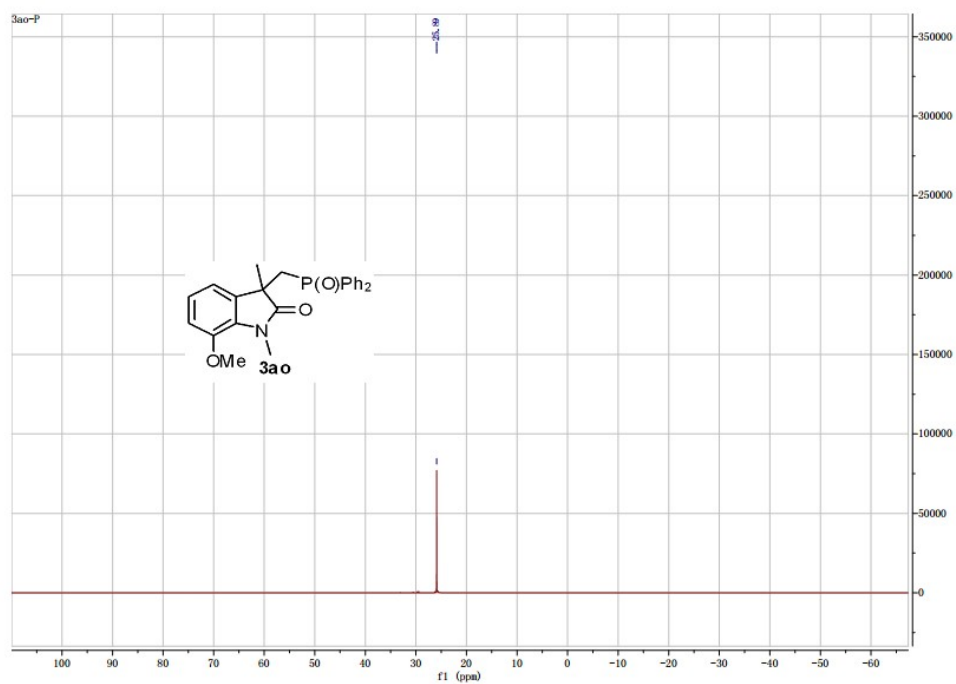

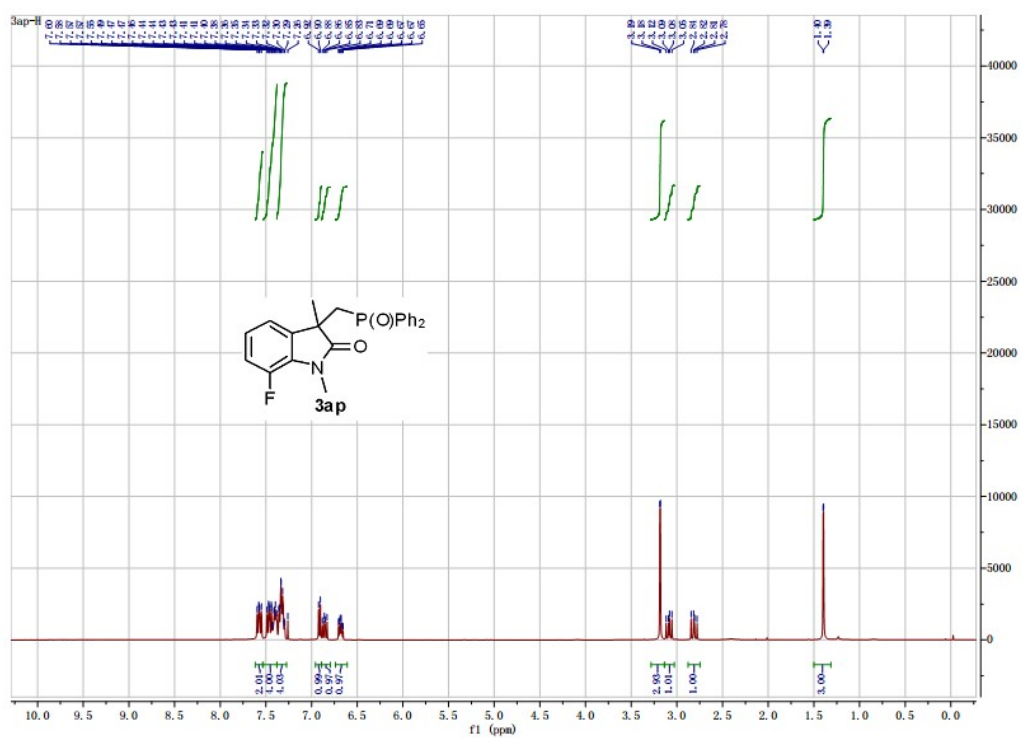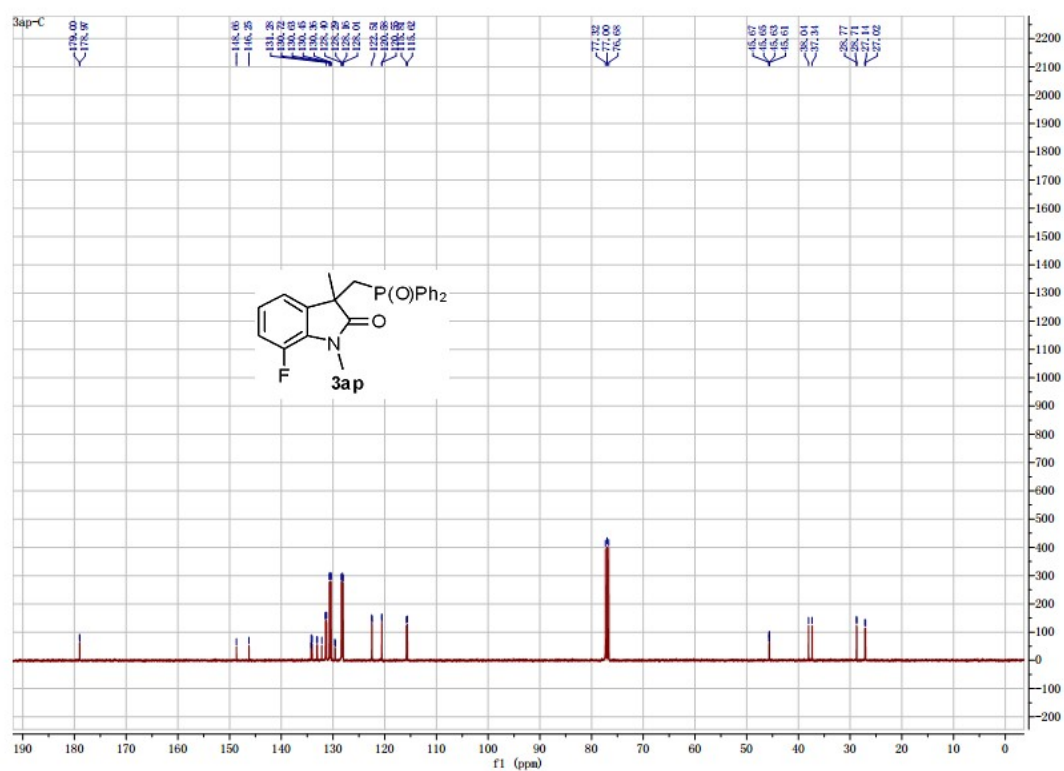

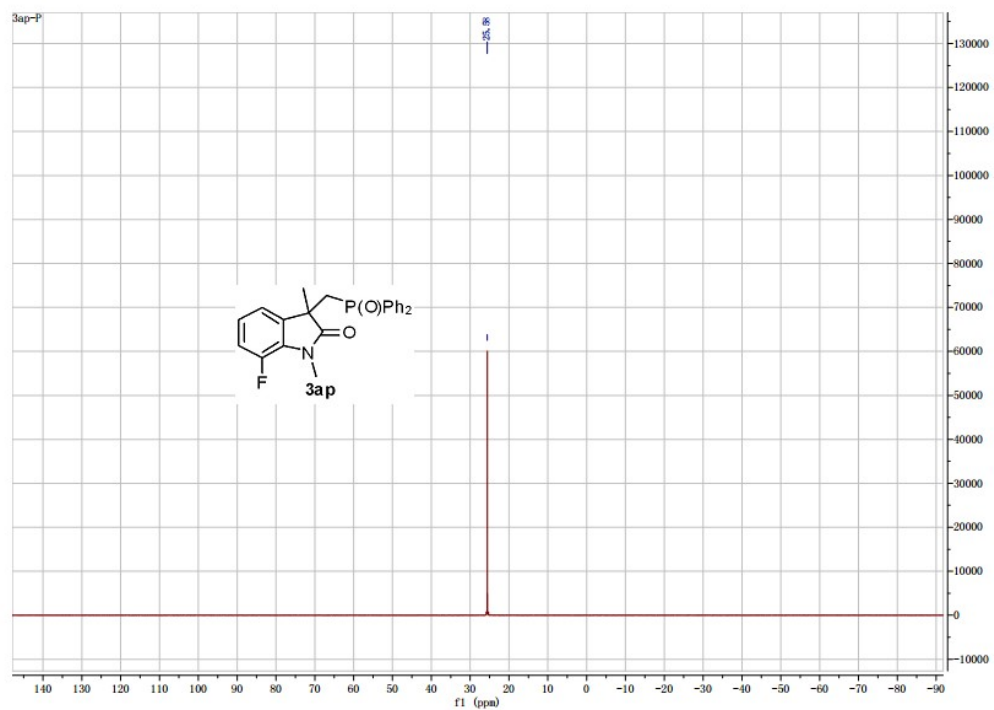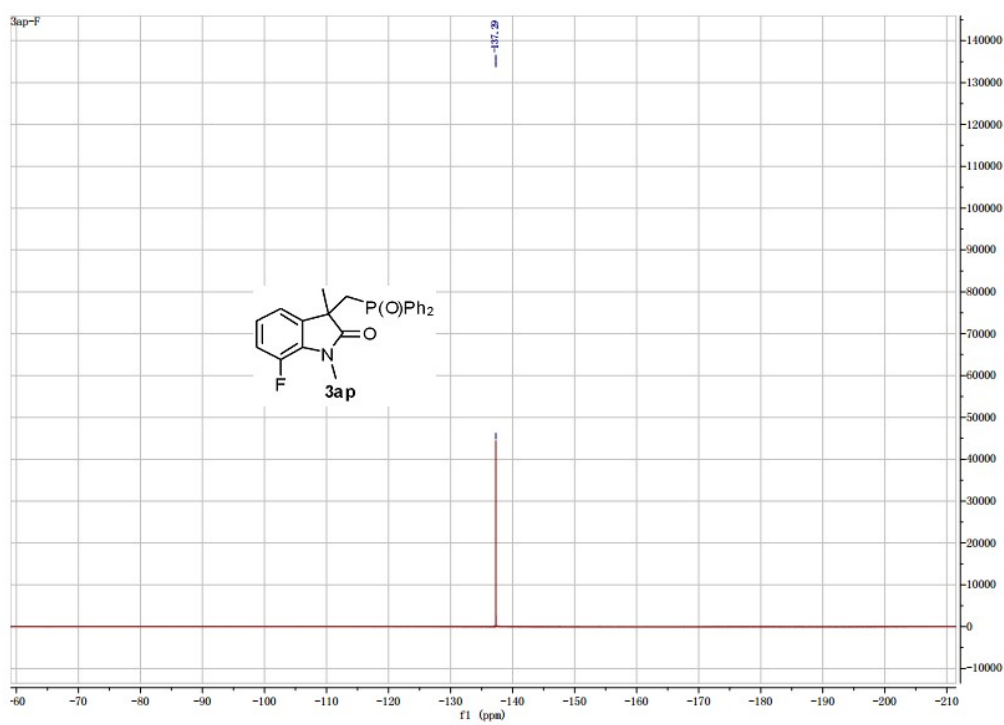



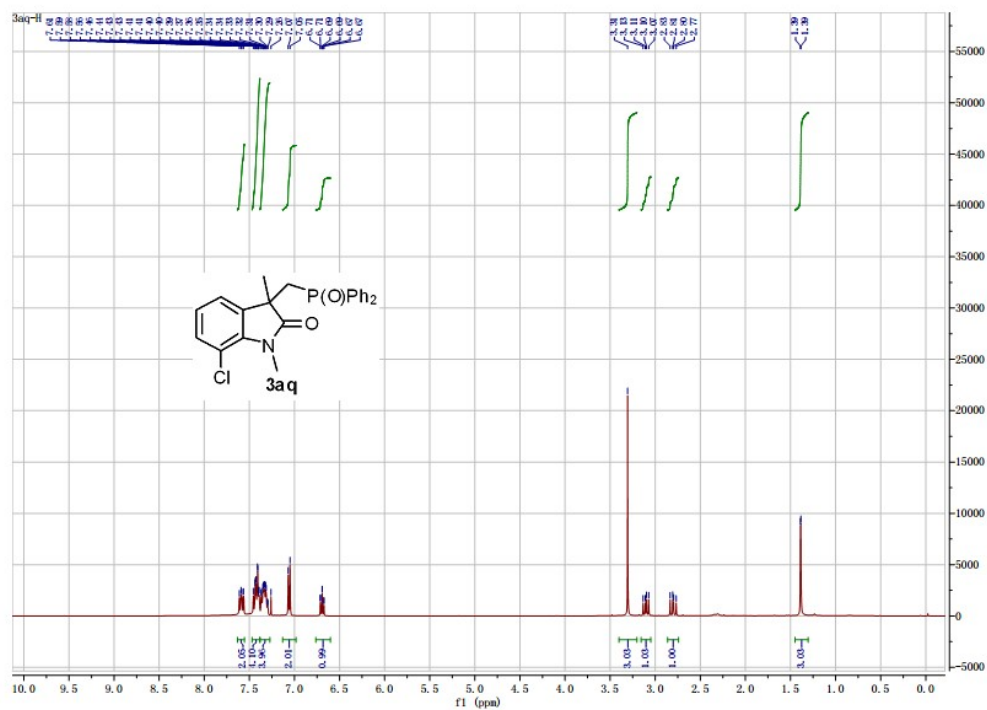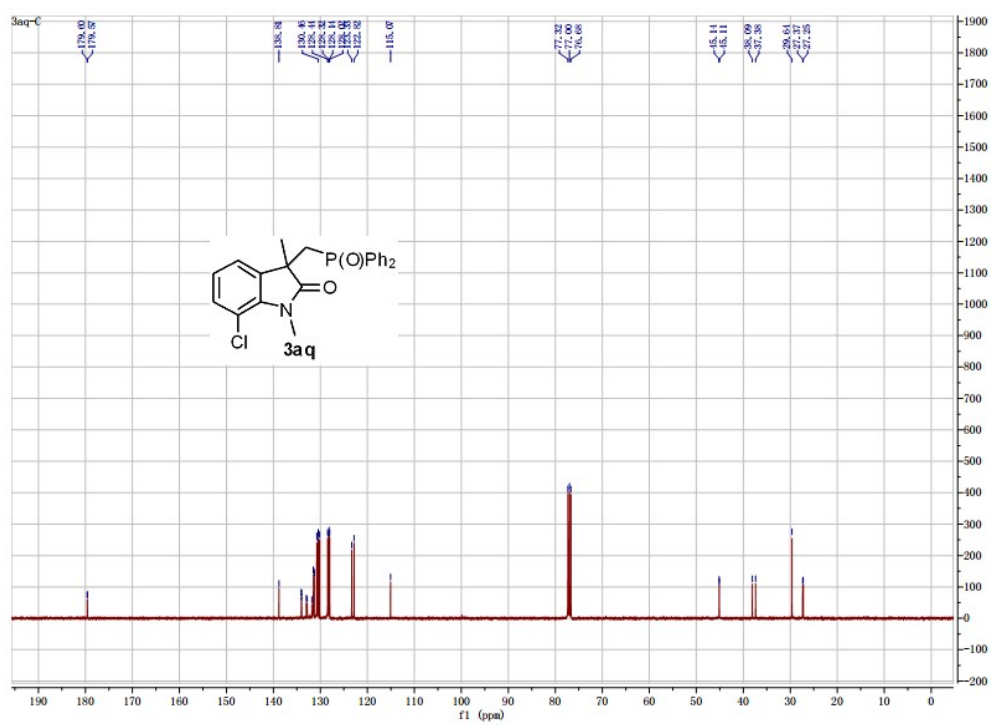







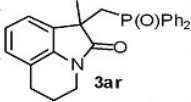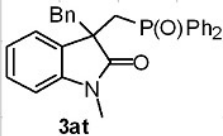

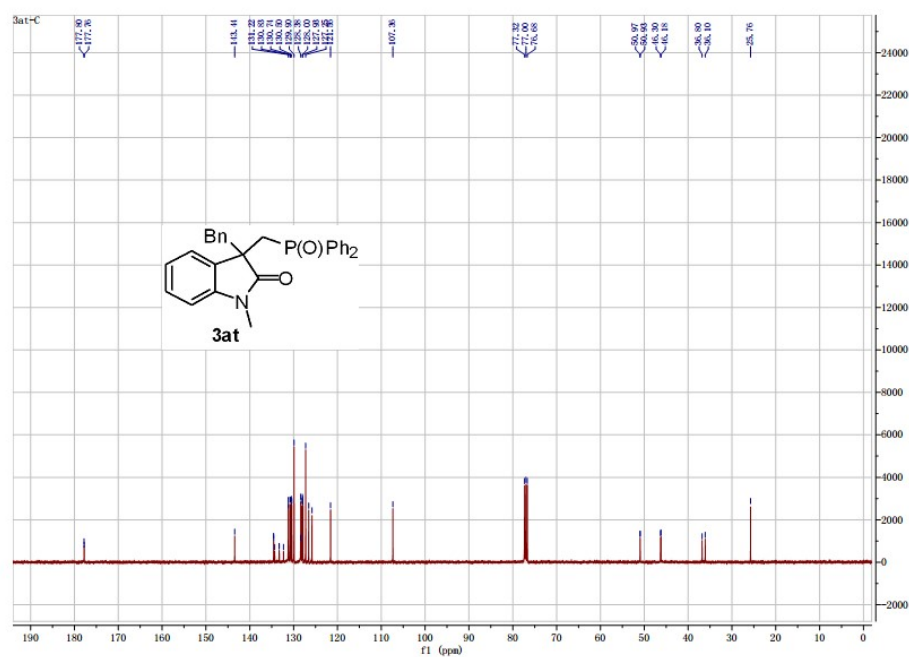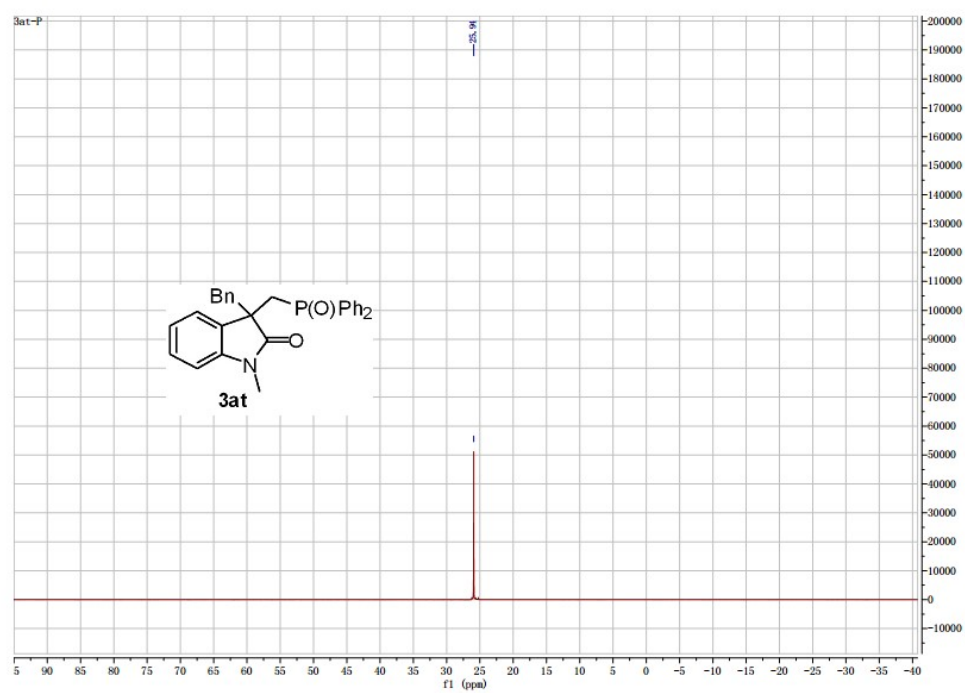

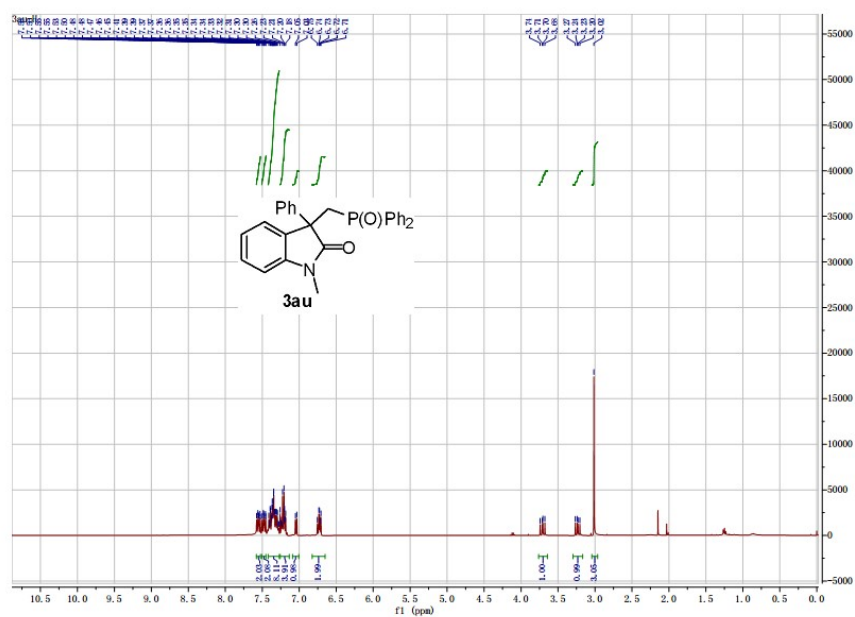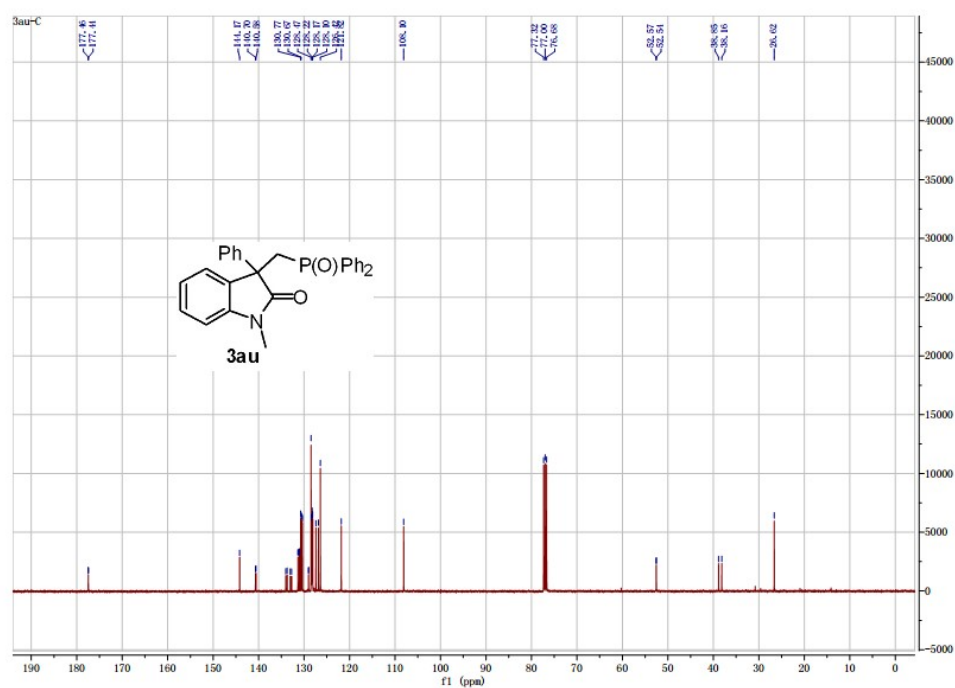

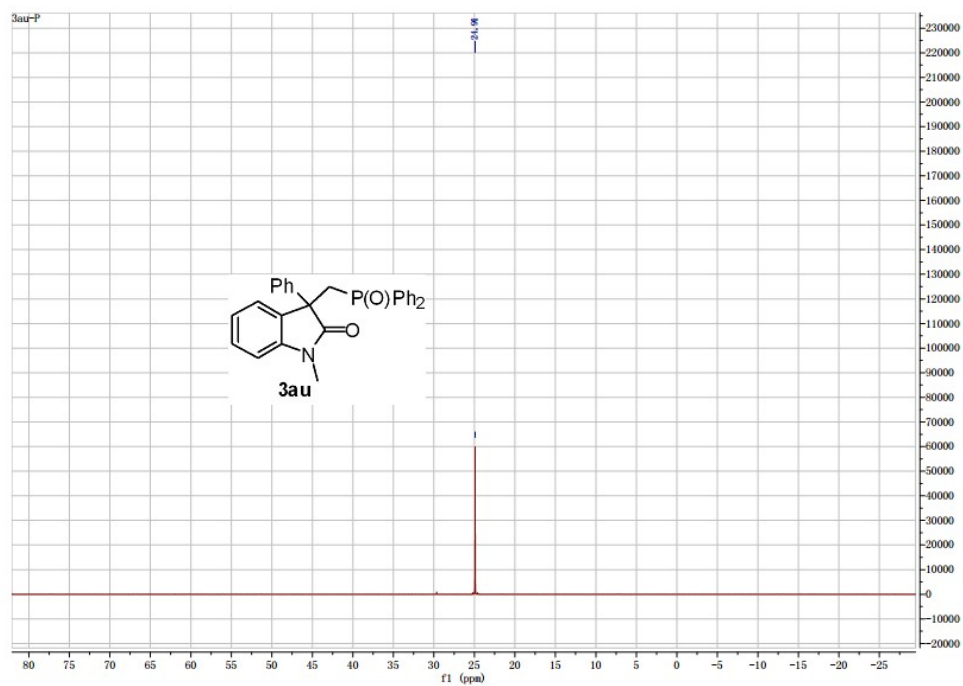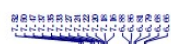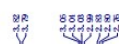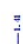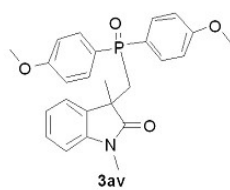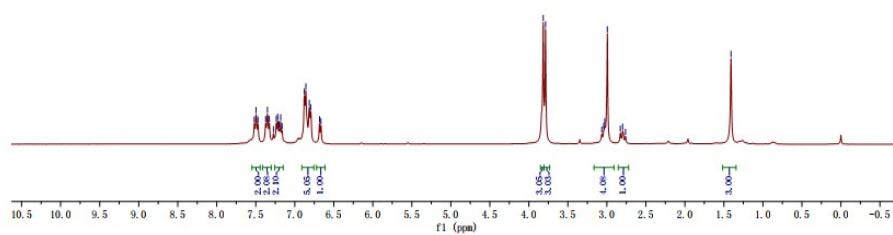



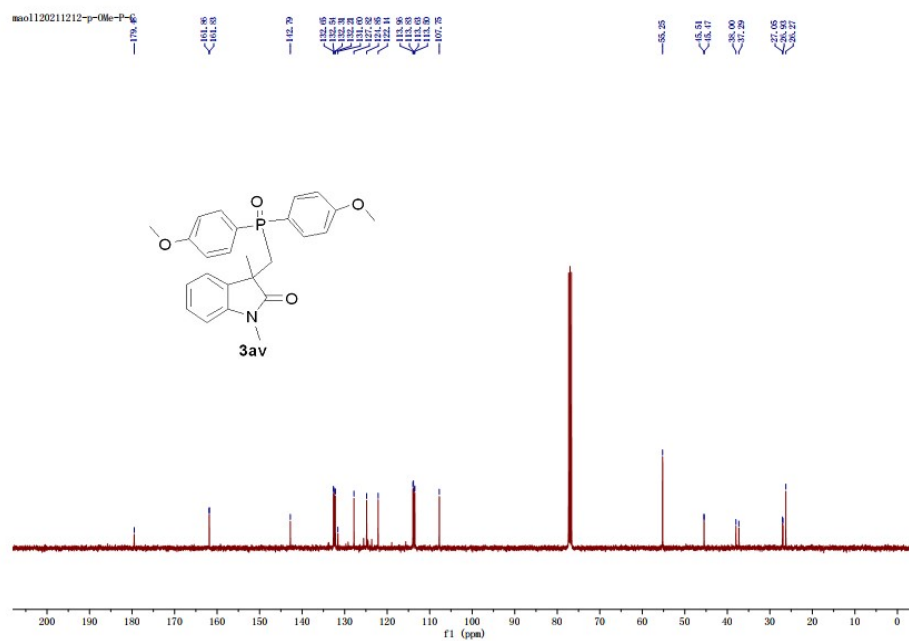

mol120211129-CF3

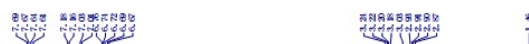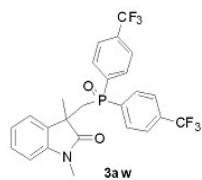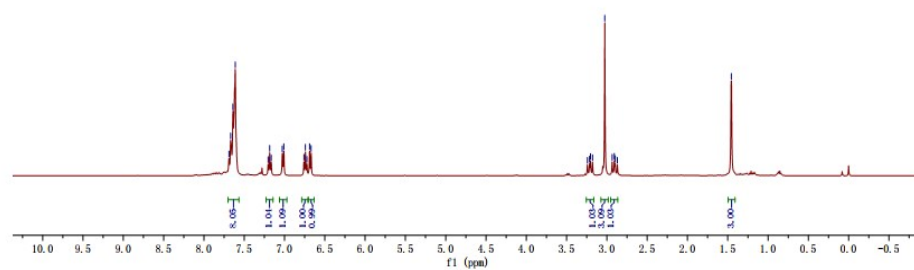

mol120211203-CF3-P

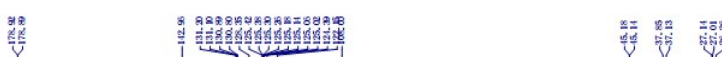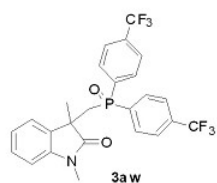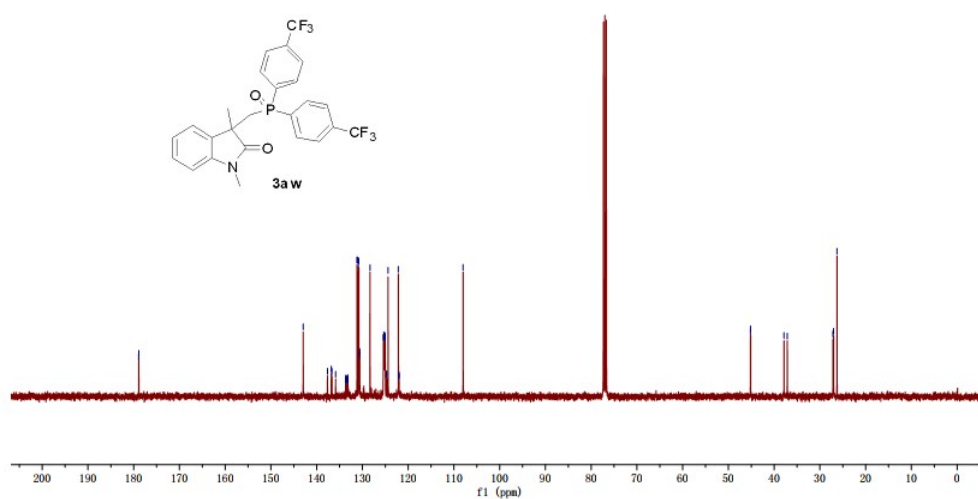

msol120211129-CF3

—21.36

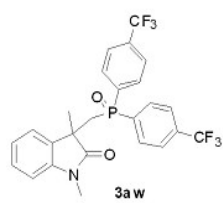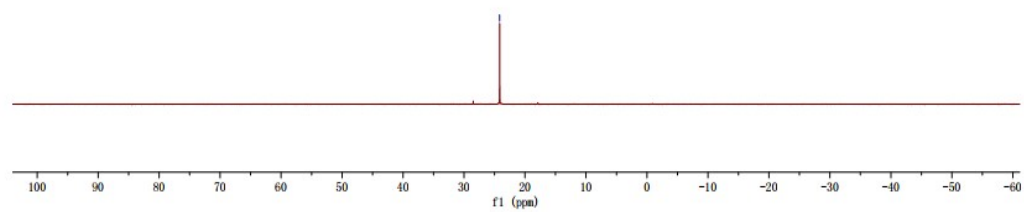

msol120211129-CF3

—63.02

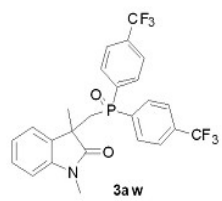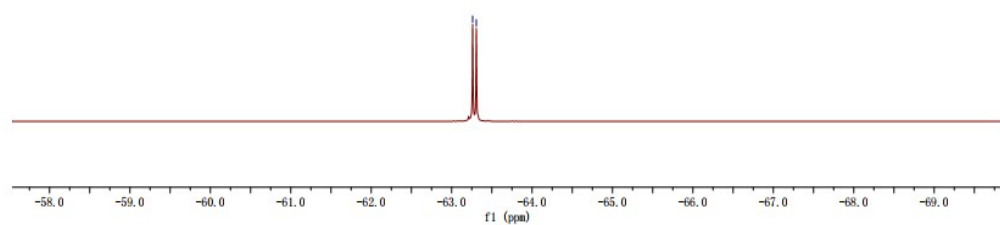

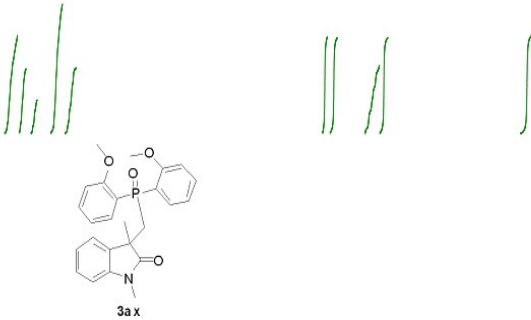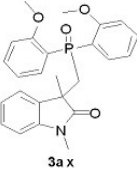

—25.62

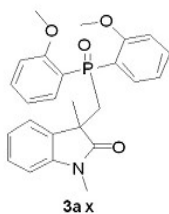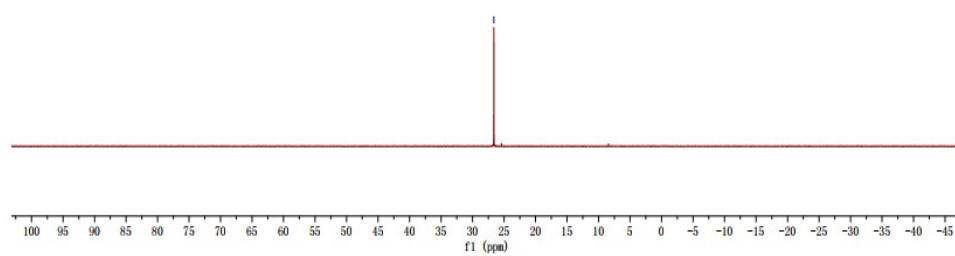

maol12021200.pdf

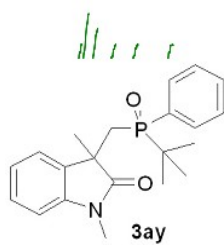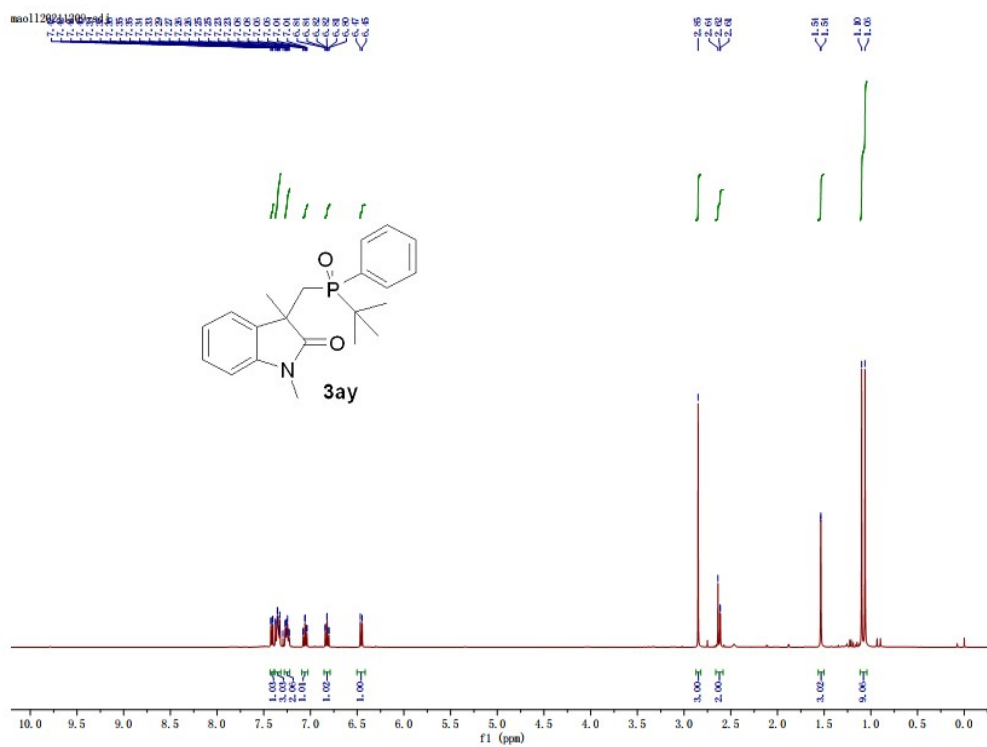

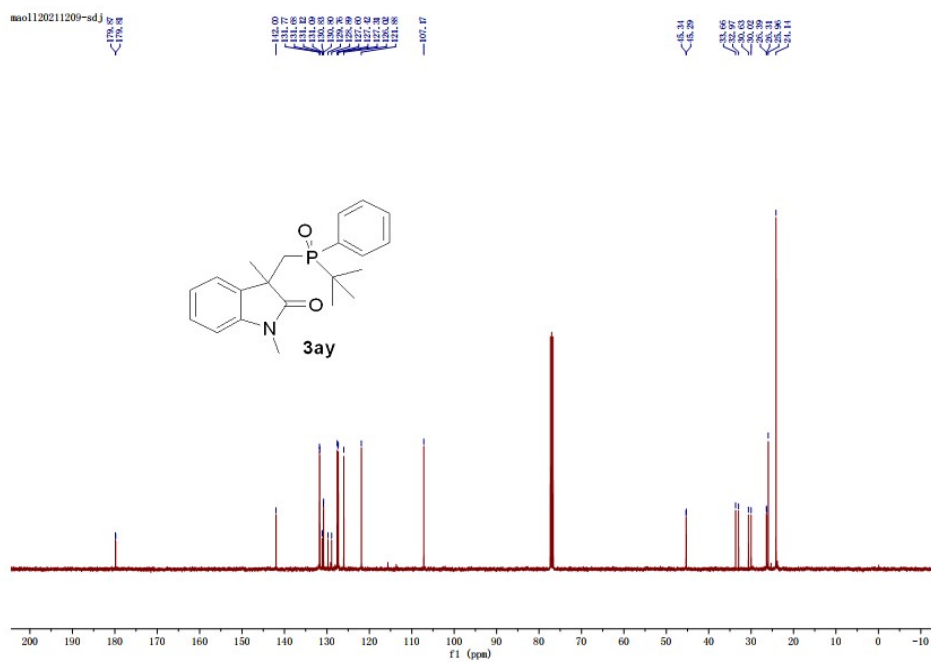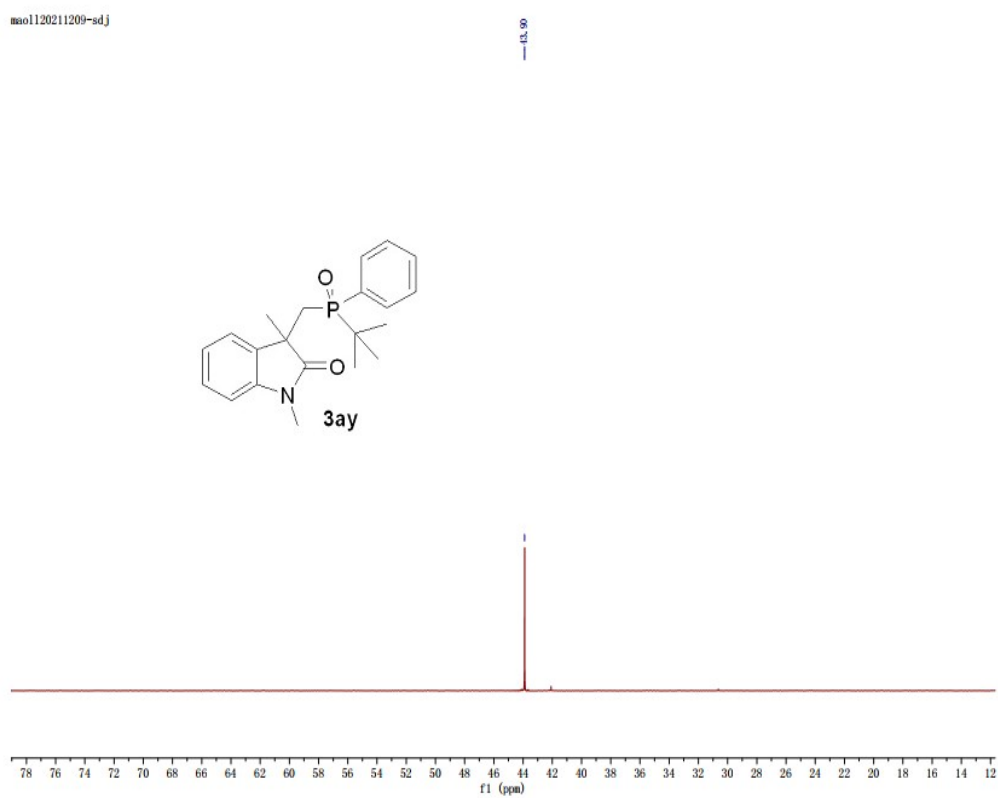

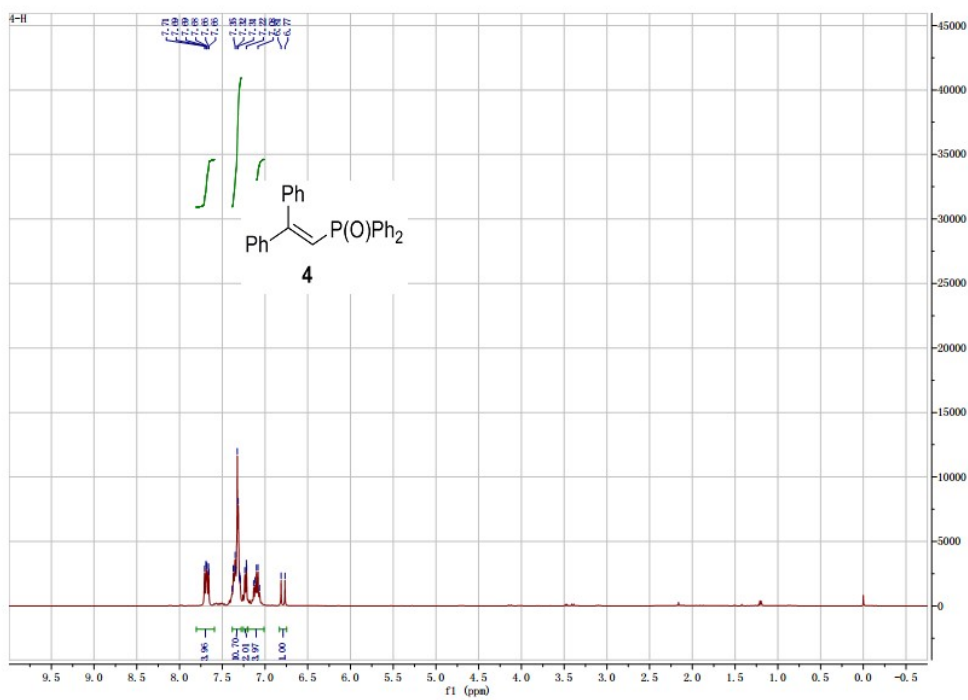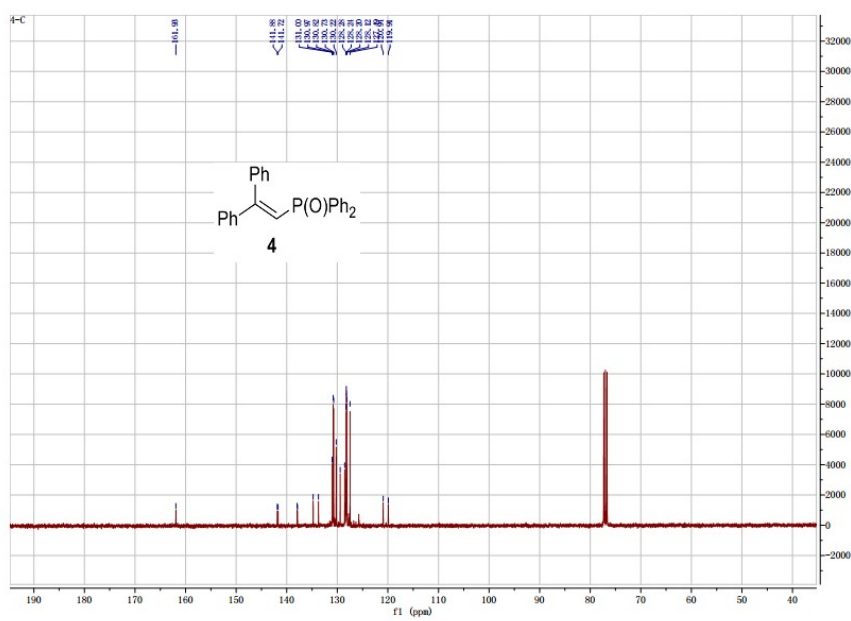

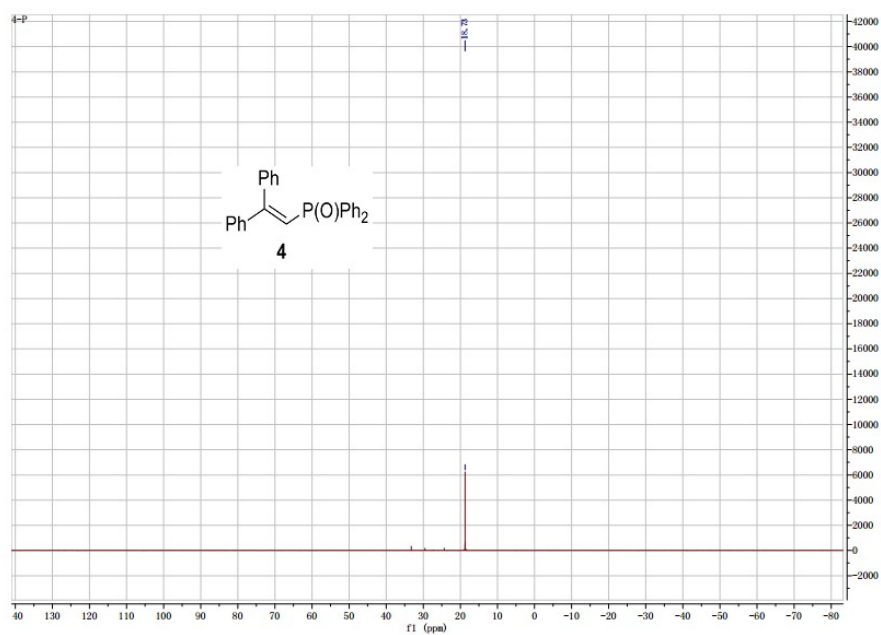

Supplement: d1ob02486h1.pdf [file d1ob02486h1.pdf]
